# Supplementary material for: An evaluation of anion suitability for use in ionic liquids with long-term, high-temperature thermal stability
Source: Royal Society of Chemistry journal article supplement (doi:10.1039/c7nj01788j), 2017-01-01
Supplement: c7nj01788j1.pdf [file c7nj01788j1.pdf]

**96 hour aerobic thermolysis of PPN<sup>+</sup>X<sup>-</sup> salts at  
200 °C, 250 °C, and 300 °C. An evaluation of  
anion suitability for use in ionic liquids with  
long-term, high-temperature thermal stability**

Adela Benchea,<sup>a</sup> Benjamin Siu,<sup>b</sup> Mohammad Soltani,<sup>a</sup> E. Alan Salter,<sup>a</sup> Andrzej Wierzbicki,<sup>a</sup> Kevin N. West,<sup>\*b</sup> and James H. Davis, Jr.<sup>\*a</sup>

*a* Department of Chemistry, University of South Alabama, Mobile, Alabama 36688 USA.

*b* Department of Chemical & Biomolecular Engineering, University of South Alabama, Mobile, Alabama 36688 USA.

## SUPPORTING INFORMATION

---

- DSC Traces for all salts (**1-14**)
- Electrostatic potential maps for the Sac<sup>-</sup> and BDSA<sup>-</sup> anions, and computational details
- Multinuclear NMR spectra of all new salts (**5, 6, 8, 10, 11, 14**)

# Differential Scanning Calorimetry

Top to Bottom: **1, 2, 3, 4, 5.**

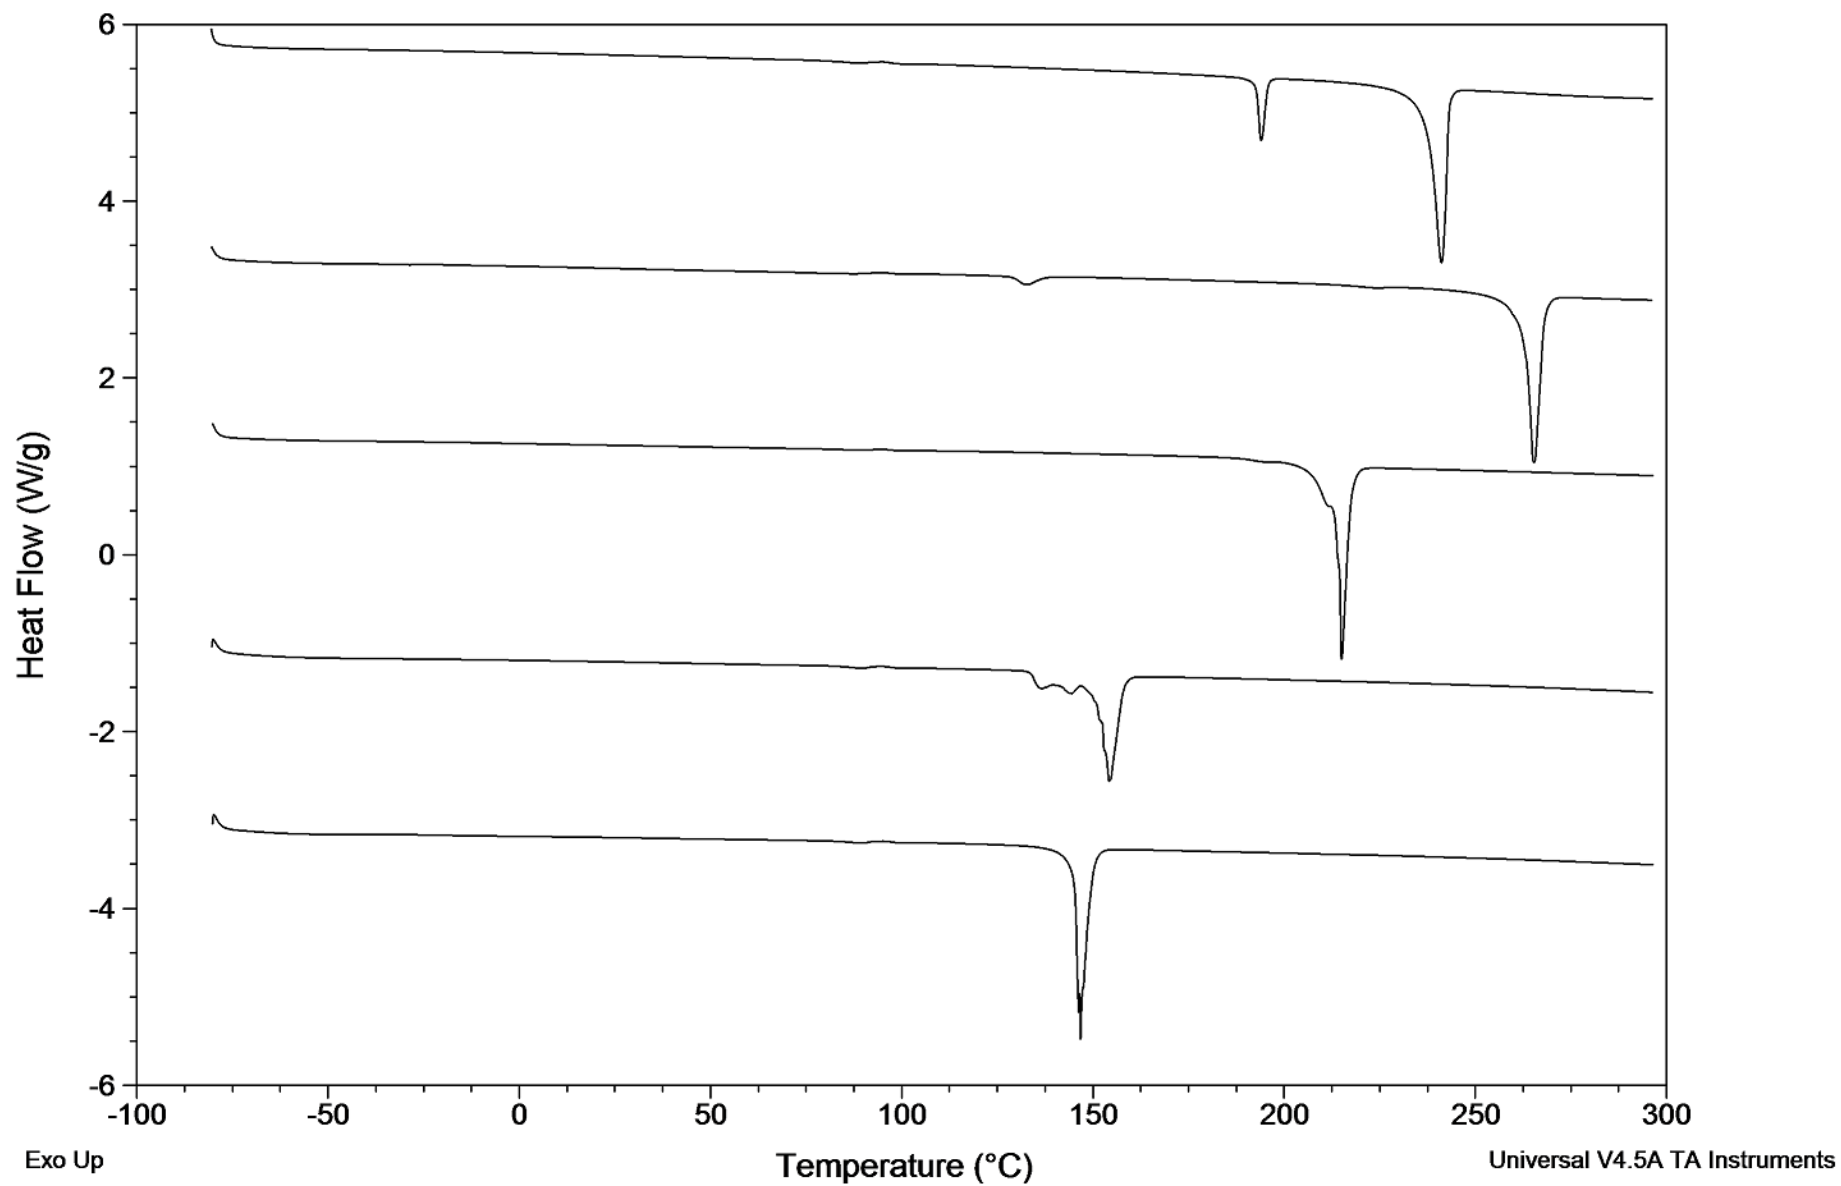

# Differential Scanning Calorimetry

Top to Bottom: **6, 7, 8.**

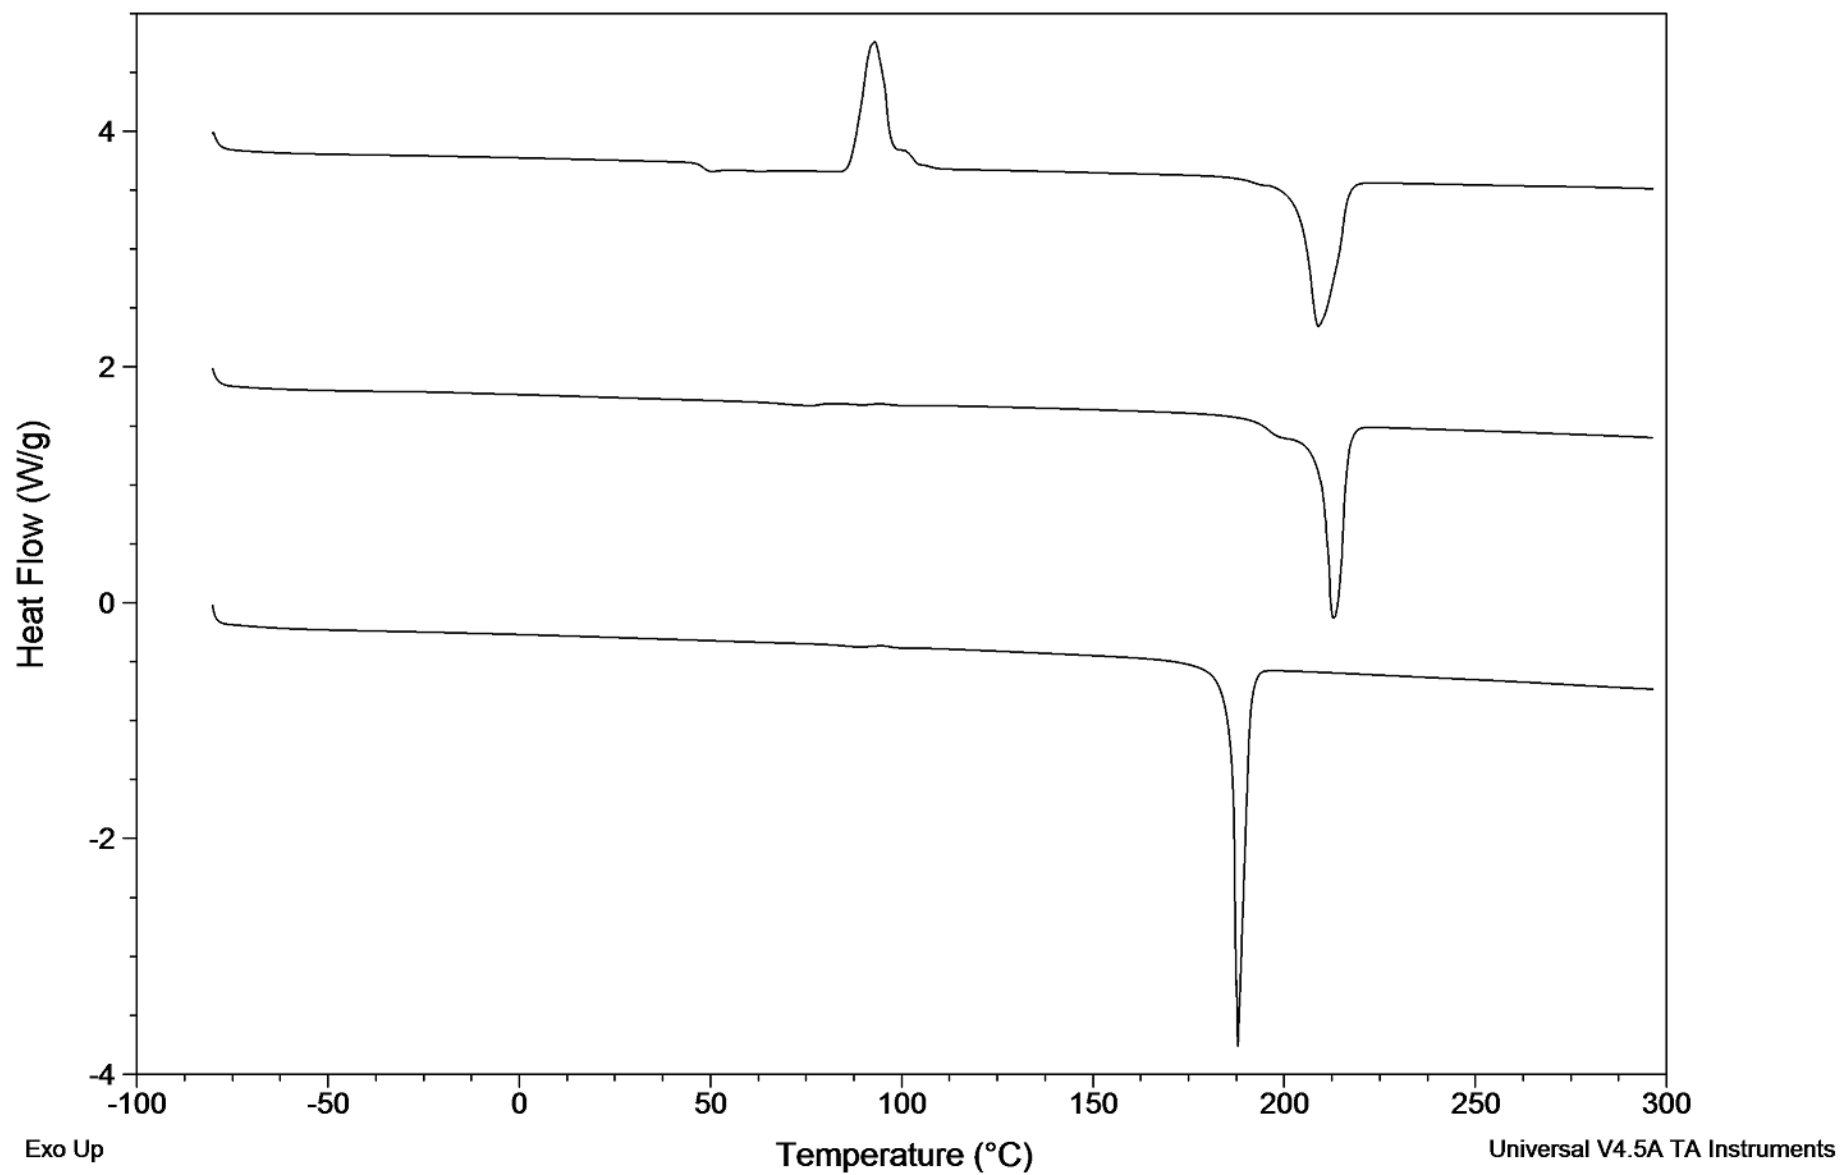

# Differential Scanning Calorimetry

Top to Bottom: **9, 10, 11, 12.**

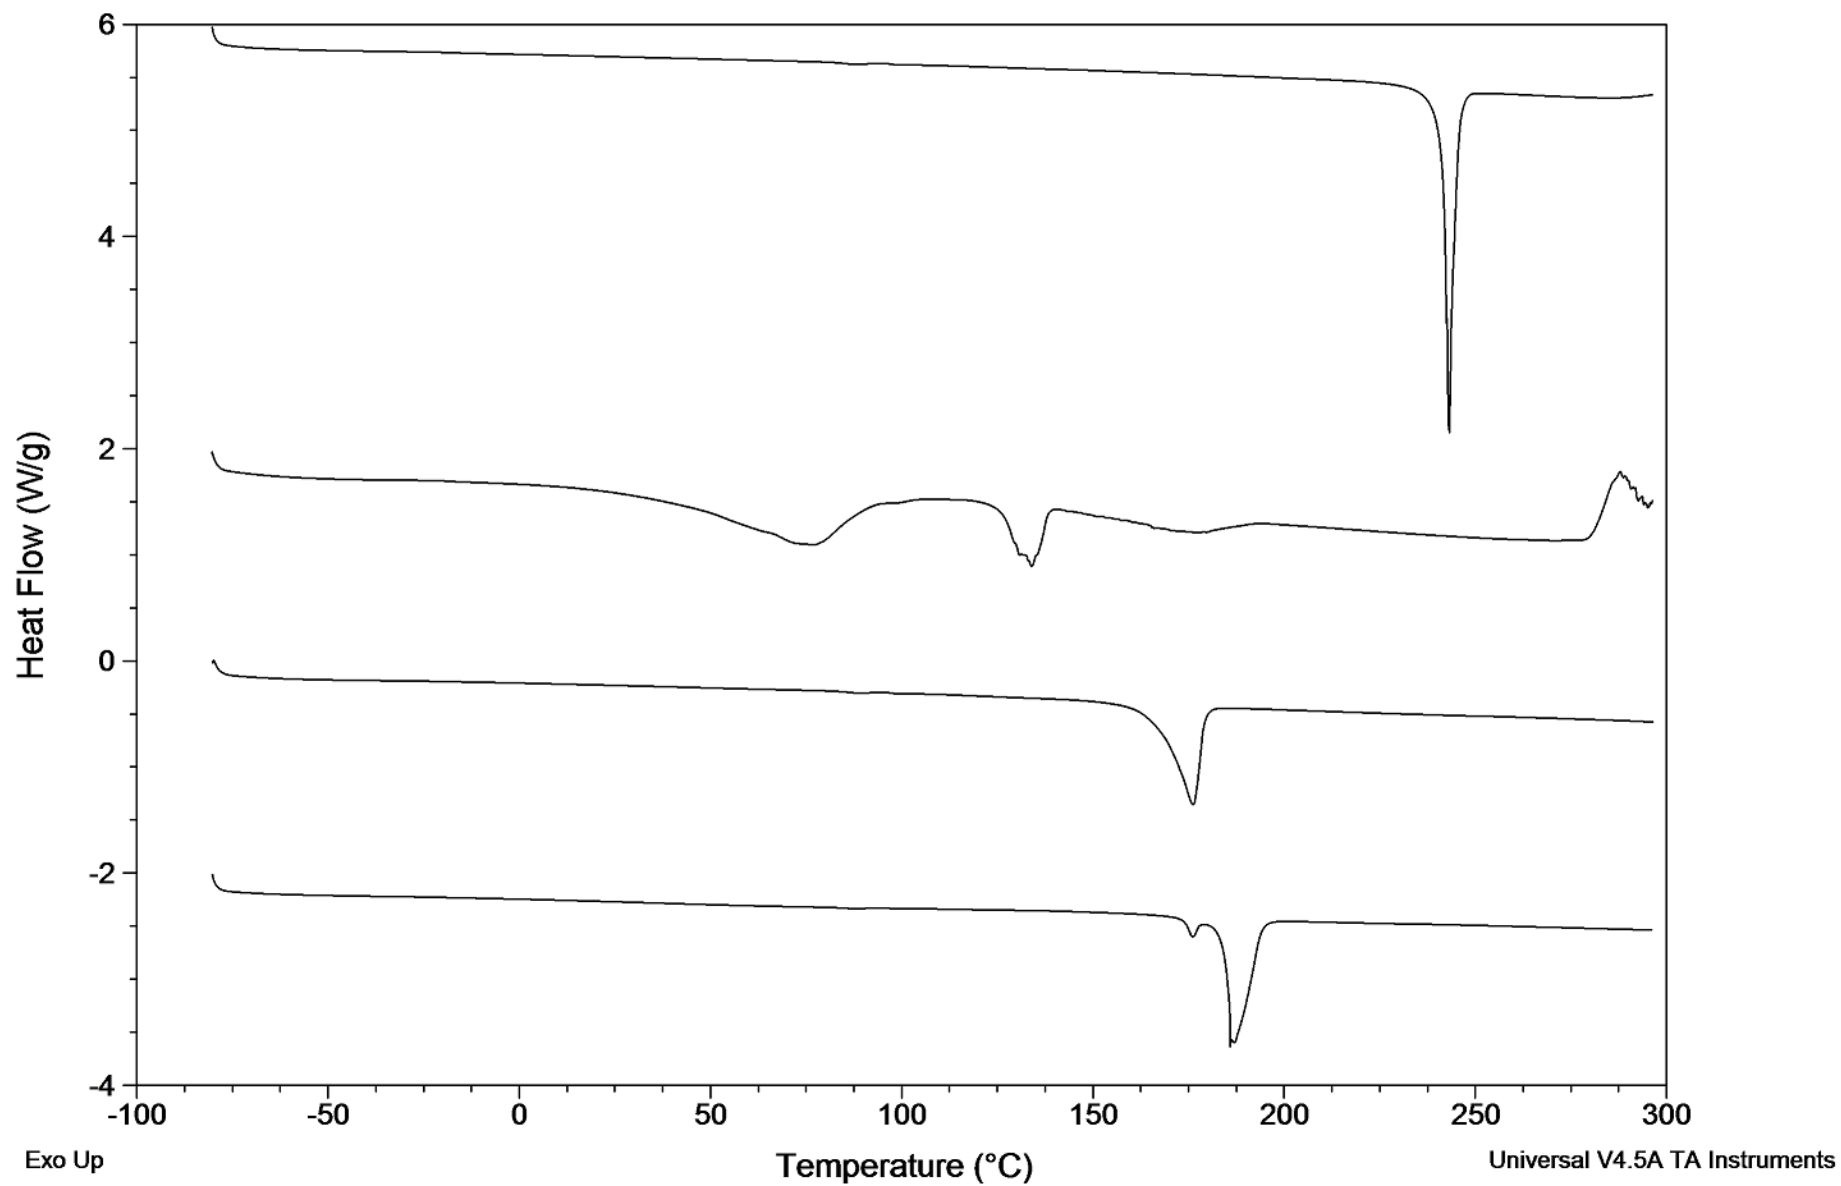

# Differential Scanning Calorimetry

Top to Bottom: **13, 14.**

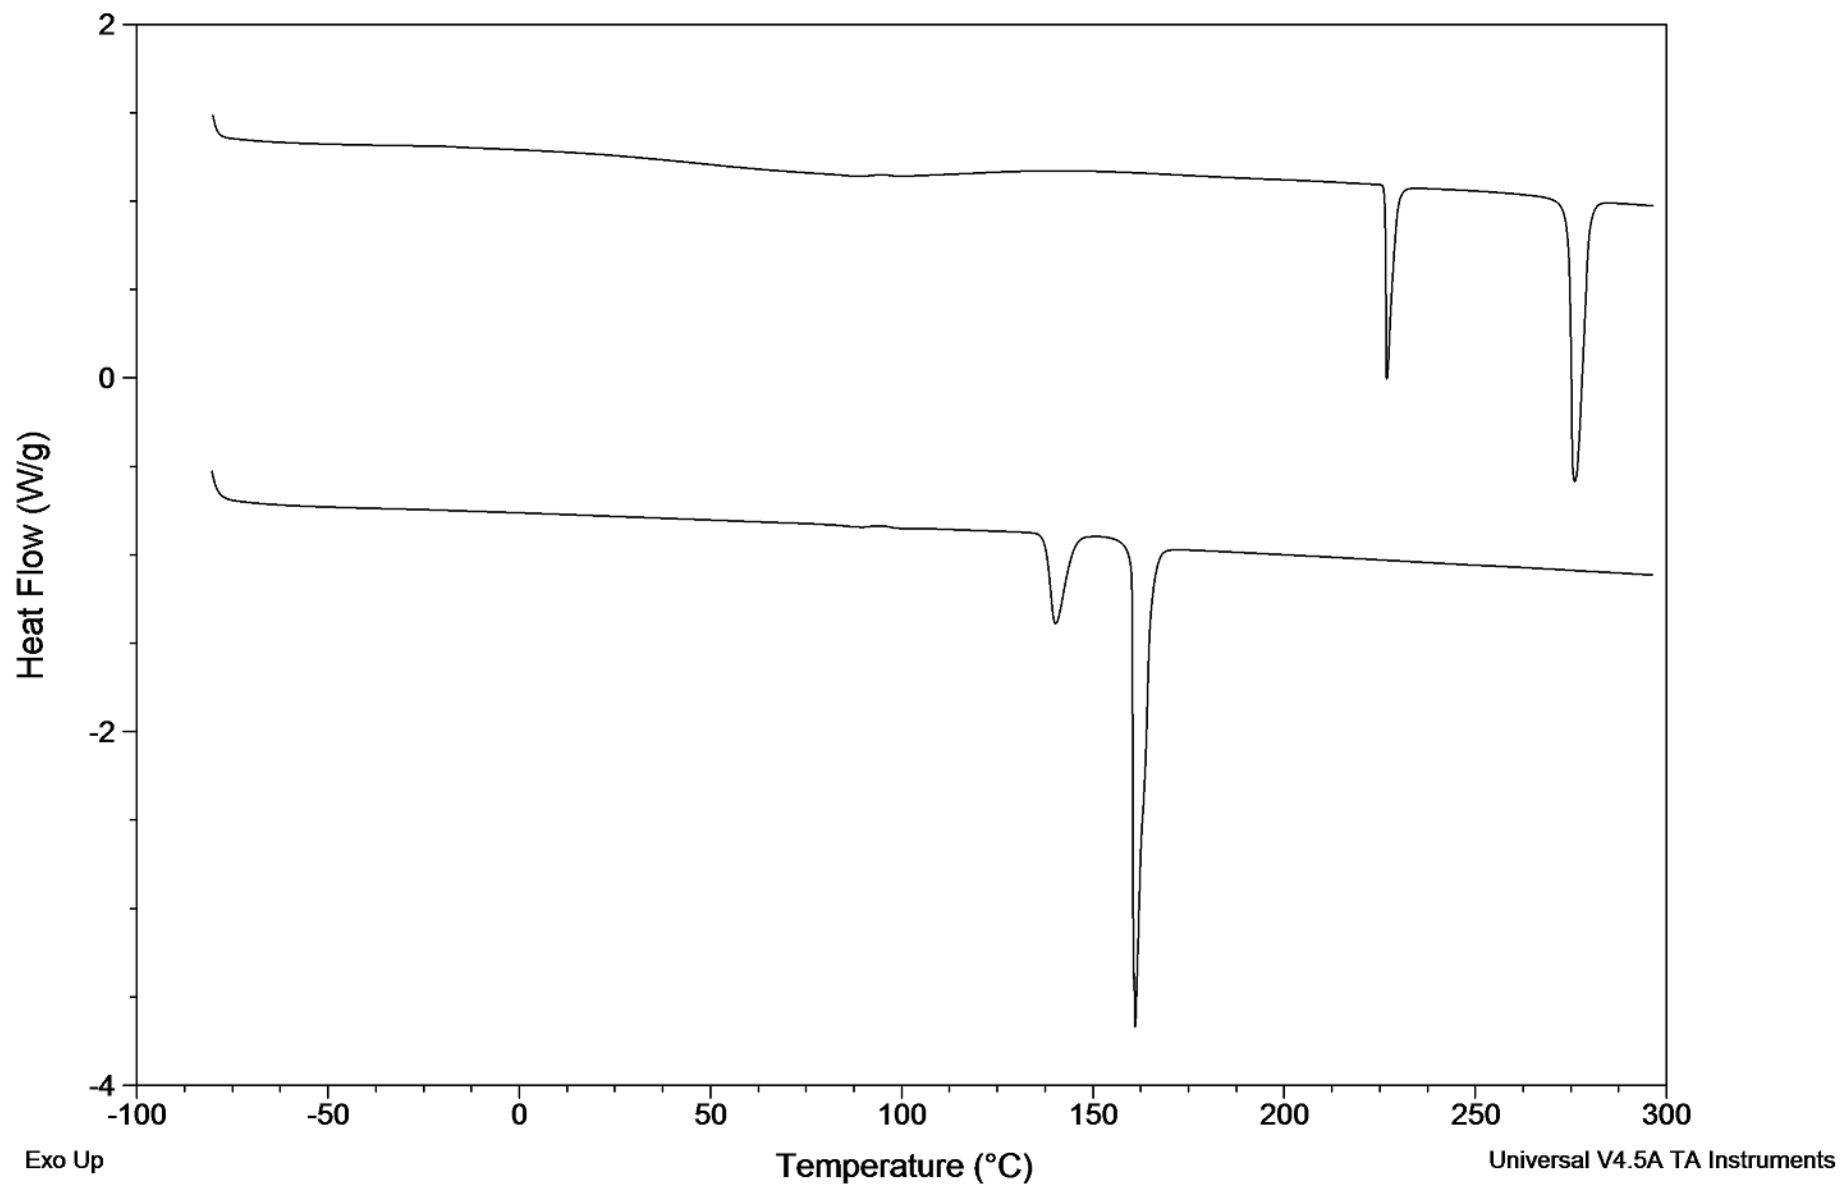

## Computational Outcomes

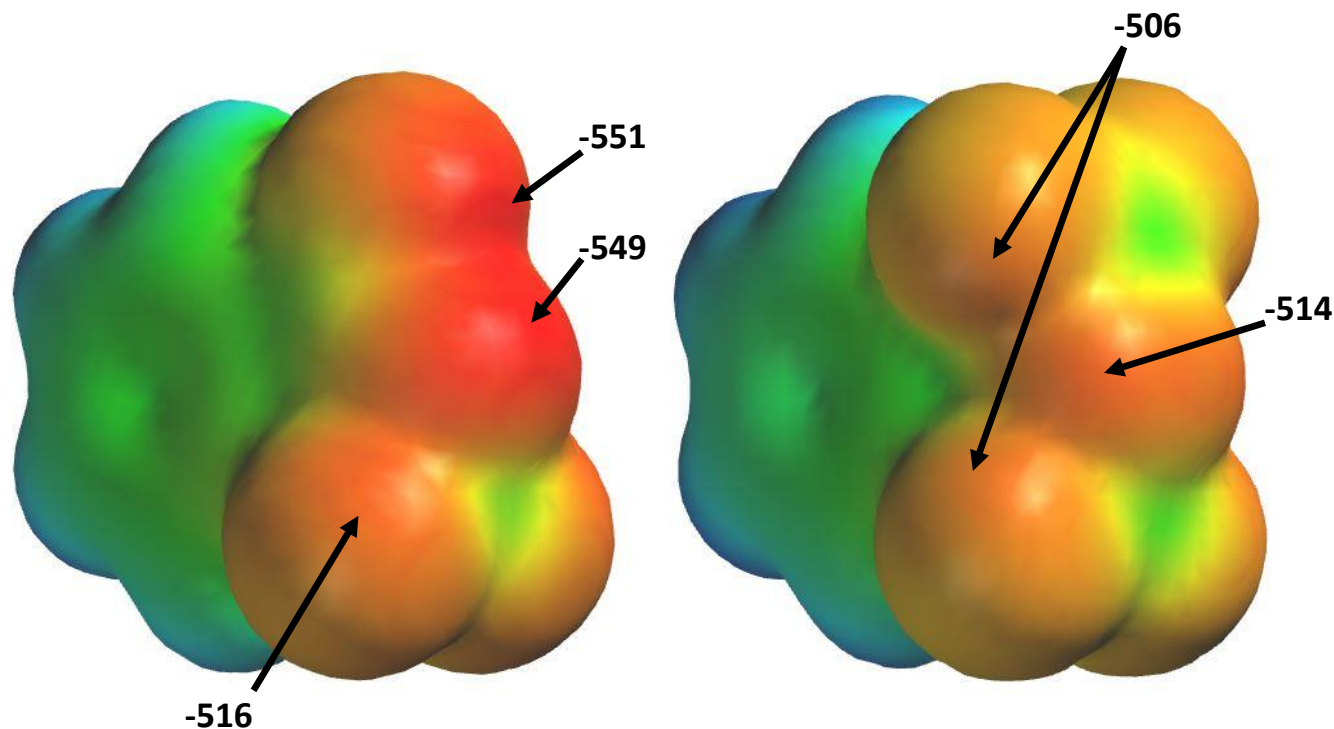

Electrostatic potential energy surface plots for Sac<sup>-</sup> (left) and BDSA<sup>-</sup> (right) generated by Spartan'08 [computational model: B3LYP/6-311+G(d,p)].

Color range: -551 (red) to -102 (blue) kJ/mol. Selected local extrema are indicated. For Sac<sup>-</sup>, the most negative site is associated with the carbonyl oxygen at -551 kJ/mol, followed closely by a site near the imidate N at -549 kJ/mol; the regions about the sulfonyl O atoms (orange) are generally not as negative as the imidate N or the carbonyl oxygen (red). The imidate moiety of BDSA<sup>-</sup> is comparatively less negative than its counterpart in Sac<sup>-</sup>; the most negative site on Sac<sup>-</sup> is near the imidate N at -514 kJ/mol.

A.D. Becke, J. Chem. Phys. 98 (1993) 5648-5652;  
C. Lee, W. Yang, R.G. Parr, Phys. Rev. B 37 (1988) 785-789;  
S.H. Vosko, L. Wilk, M. Nusair, Can. J. Phys. 58 (1980) 1200-1211;  
P.J. Stephens, F.J. Devlin, C.F. Chabalowski, M.J. Frisch, J. Phys. Chem. 98 (1994) 11623-11627.

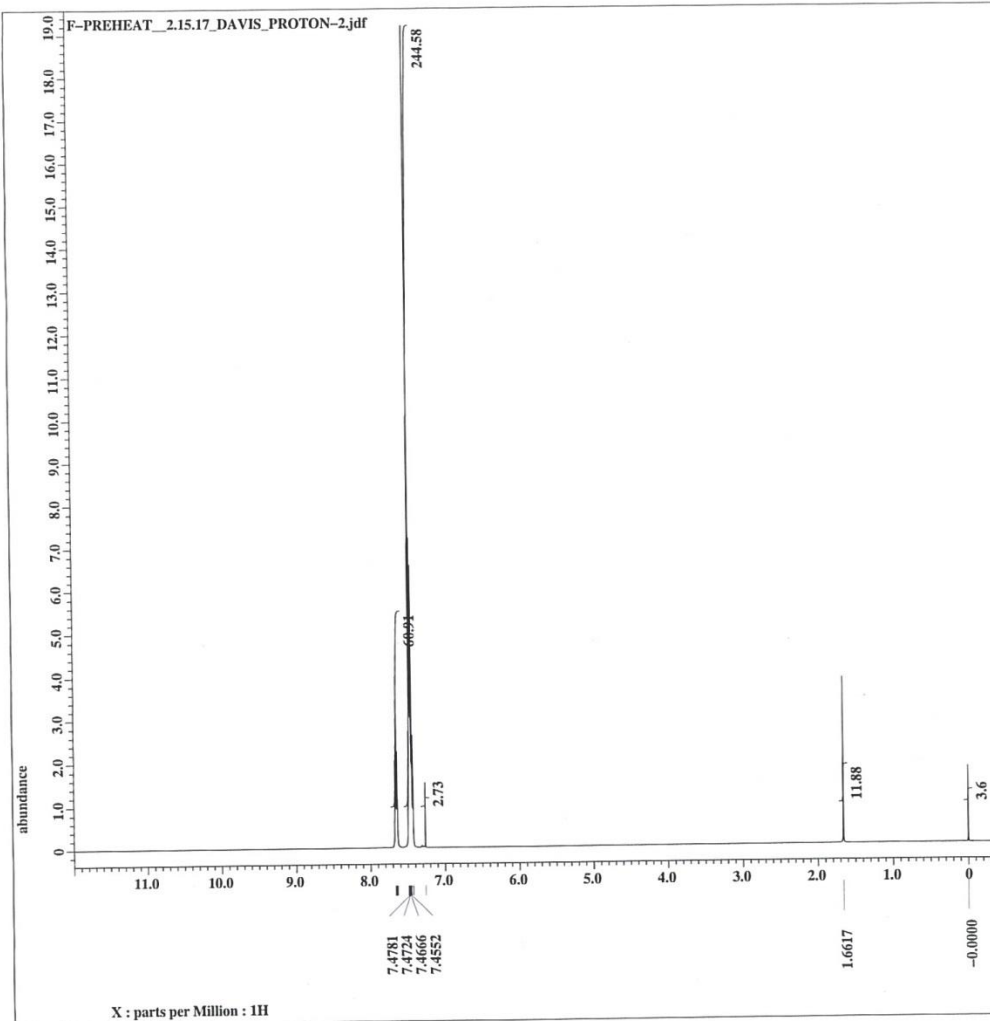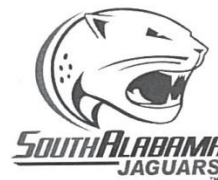

```

Filename      = F-PREHEAT_2.15.17_DA
Author       = Jim Davis
Experiment    = single_pulse.ex2
Sample_id    = F-PREHEAT_2.15.17_DA
Solvent      = CHLOROFORM-D
Changer_sample = 22
Creation_time = 15-FEB-2017 17:38:25
Revision_time = 15-FEB-2017 17:22:08
Current_time  = 15-FEB-2017 17:22:08

Data_format   = 1D COMPLEX
Dim_size      = 13107
Dim_title     = 1H
Dim_units     = [ppm]
Dimensions    = X
Site          = ECA 500
Spectrometer  = JNM-ECA500

Field_strength = 11.7473579[T] (500 [MH
X_acq_duration = 1.74587904[s]
X_domain       = 1H
X_freq         = 500.15991521 [MHz]
X_offset       = 5.0 [ppm]
X_points       = 16384
X_prescans     = 1
X_resolution   = 0.57277737 [Hz]
X_sweep        = 9.38438438 [kHz]
Irr_domain     = 1H
Irr_freq       = 500.15991521 [MHz]
Irr_offset     = 5.0 [ppm]
Tri_domain     = 1H
Tri_freq       = 500.15991521 [MHz]
Tri_offset     = 5.0 [ppm]
Clipped        = FALSE
Mod_return     = 1
Scans          = 16
Total_scans    = 16

X_90_width    = 13.07 [us]
X_acq_time    = 1.74587904[s]
X_angle       = 45 [deg]
X_atn         = 4 [dB]
X_pulse       = 6.535 [us]
Irr_mode      = Off
Tri_mode      = Off
Dante_preset  = FALSE
Initial_wait  = 1 [s]
Recvr_gain    = 40
Relaxation_delay = 4 [s]
Repetition_time = 5.74587904[s]
Temp_get      = 20.9 [dc]
  
```

PPN BETI,  
IL#5

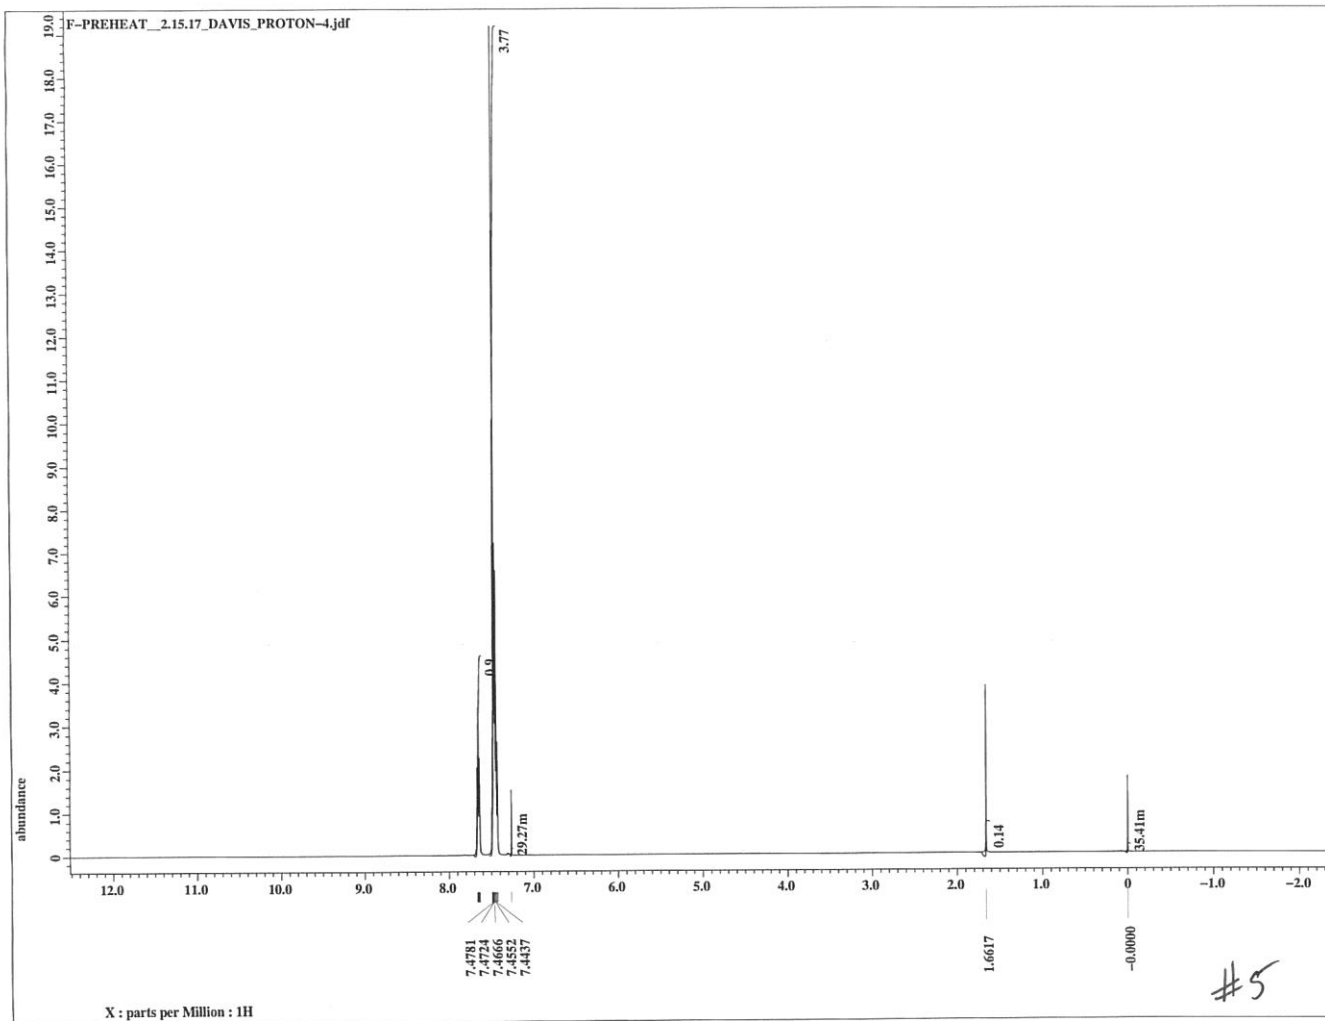



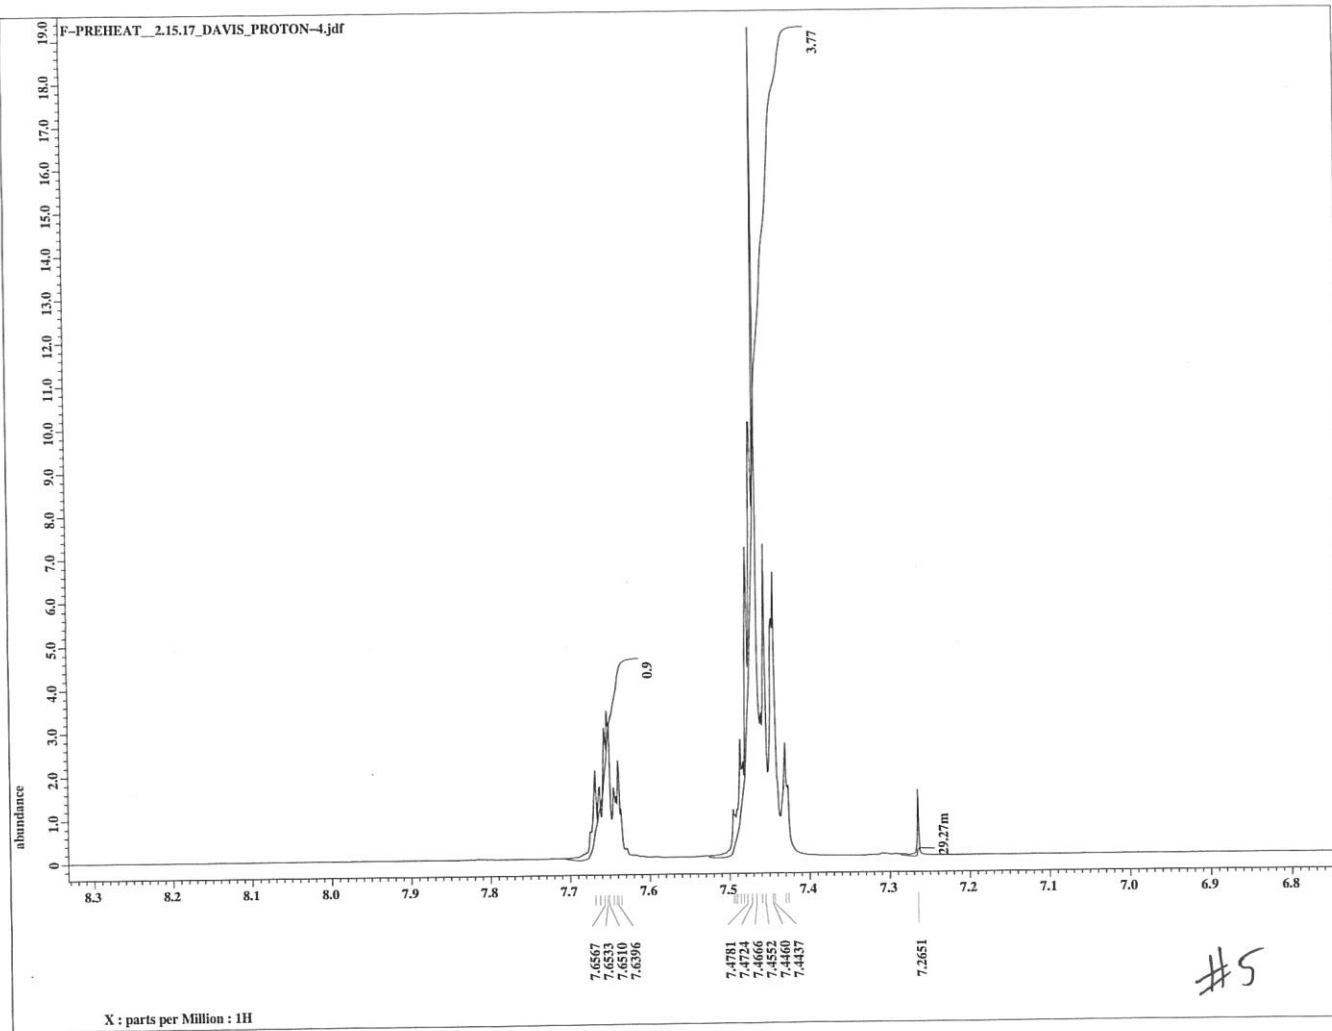

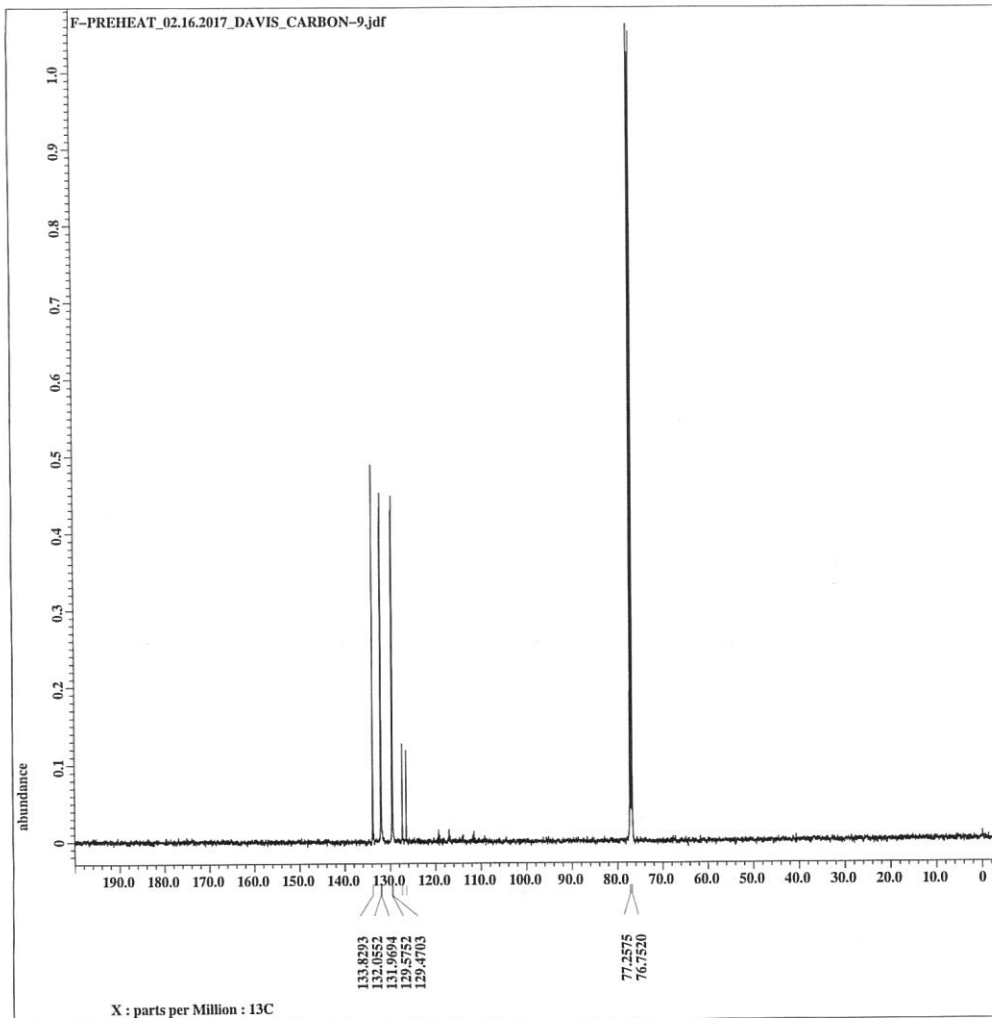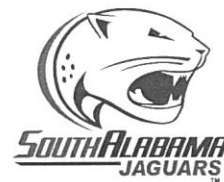

|                  |                           |
|------------------|---------------------------|
| Filename         | = F-PREHEAT_02.16.2017_   |
| Author           | = Jim Davis               |
| Experiment       | = single_pulse_dec        |
| Sample_id        | = F-PREHEAT_02.16.2017_   |
| Solvent          | = CHLOROFORM-D            |
| Changer_sample   | = 22                      |
| Creation_time    | = 16-FEB-2017 15:29:04    |
| Revision_time    | = 16-FEB-2017 15:12:51    |
| Current_time     | = 16-FEB-2017 15:12:51    |
| Data_format      | = 1D COMPLEX              |
| Dim_size         | = 26214                   |
| Dim_title        | = 13C                     |
| Dim_units        | = [ppm]                   |
| Dimensions       | = X                       |
| Site             | = ECA 500                 |
| Spectrometer     | = JNM-ECA500              |
| Field_strength   | = 11.7473579 [T] (500 [MH |
| X_acq_duration   | = 0.83361792 [s]          |
| X_domain         | = 13C                     |
| X_freq           | = 125.76529768 [MHz]      |
| X_offset         | = 100 [ppm]               |
| X_points         | = 32768                   |
| X_prescans       | = 4                       |
| X_resolution     | = 1.19959034 [Hz]         |
| X_sweep          | = 39.3081761 [kHz]        |
| Irr_domain       | = 1H                      |
| Irr_freq         | = 500.15991521 [MHz]      |
| Irr_offset       | = 5.0 [ppm]               |
| Clipped          | = FALSE                   |
| Mod_return       | = 1                       |
| Scans            | = 1024                    |
| Total_scans      | = 1024                    |
| X_90_width       | = 12.7 [us]               |
| X_acq_time       | = 0.83361792 [s]          |
| X_angle          | = 30 [deg]                |
| X_atn            | = 6 [dB]                  |
| X_pulse          | = 4.23333333 [us]         |
| Irr_atn_dec      | = 20.5 [dB]               |
| Irr_atn_noe      | = 20.5 [dB]               |
| Irr_noise        | = WALTZ                   |
| Decoupling       | = TRUE                    |
| Initial_wait     | = 1 [s]                   |
| Noe              | = TRUE                    |
| Noe_time         | = 2 [s]                   |
| Recvr_gain       | = 60                      |
| Relaxation_delay | = 2 [s]                   |
| Repetition_time  | = 2.83361792 [s]          |
| Temp_get         | = 21.1 [dC]               |

#5

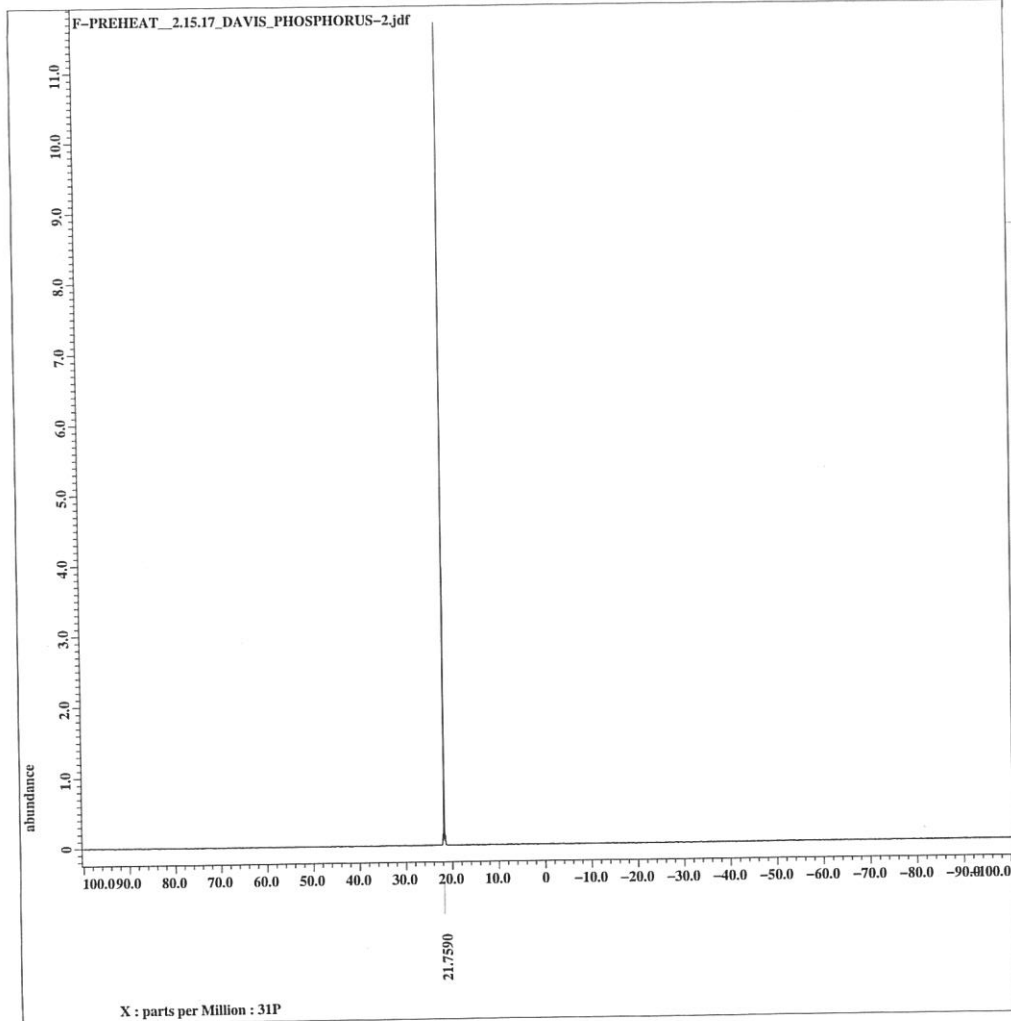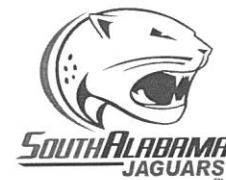

|                  |                          |
|------------------|--------------------------|
| Filename         | = F-PREHEAT_2.15.17_DA   |
| Author           | = Jim Davis              |
| Experiment       | = single_pulse_dec       |
| Sample_id        | = F-PREHEAT_2.15.17_DA   |
| Solvent          | = CHLOROFORM-D           |
| Changer_sample   | = 22                     |
| Creation_time    | = 15-FEB-2017 19:16:50   |
| Revision_time    | = 15-FEB-2017 19:00:33   |
| Current_time     | = 15-FEB-2017 19:00:33   |
| Data_format      | = 1D COMPLEX             |
| Dim_size         | = 26214                  |
| Dim_title        | = 31P                    |
| Dim_units        | = [ppm]                  |
| Dimensions       | = X                      |
| Site             | = ECA 500                |
| Spectrometer     | = JNM-ECA500             |
| Field_strength   | = 11.7473579 [T] (500[MH |
| X_acq_duration   | = 0.64487424 [s]         |
| X_domain         | = 31P                    |
| X_freq           | = 202.46831075 [MHz]     |
| X_offset         | = 0 [ppm]                |
| X_points         | = 32768                  |
| X_prescans       | = 4                      |
| X_resolution     | = 1.55068995 [Hz]        |
| X_sweep          | = 50.81300813 [kHz]      |
| Irr_domain       | = 1H                     |
| Irr_freq         | = 500.15991521 [MHz]     |
| Irr_offset       | = 5.0 [ppm]              |
| Clipped          | = FALSE                  |
| Mod_return       | = 1                      |
| Scans            | = 256                    |
| Total_scans      | = 256                    |
| X_90_width       | = 14.687 [us]            |
| X_acq_time       | = 0.64487424 [s]         |
| X_angle          | = 30 [deg]               |
| X_atn            | = 5 [dB]                 |
| X_pulse          | = 4.89566667 [us]        |
| Irr_atn_dec      | = 20.5 [dB]              |
| Irr_atn_poe      | = 20.5 [dB]              |
| Irr_noise        | = WALTZ                  |
| Decoupling       | = TRUE                   |
| Initial_wait     | = 1 [s]                  |
| Noe              | = TRUE                   |
| Noe_time         | = 2 [s]                  |
| Recvr_gain       | = 58                     |
| Relaxation_delay | = 2 [s]                  |
| Repetition_time  | = 2.64487424 [s]         |
| Temp_get         | = 21.3 [dC]              |

#5

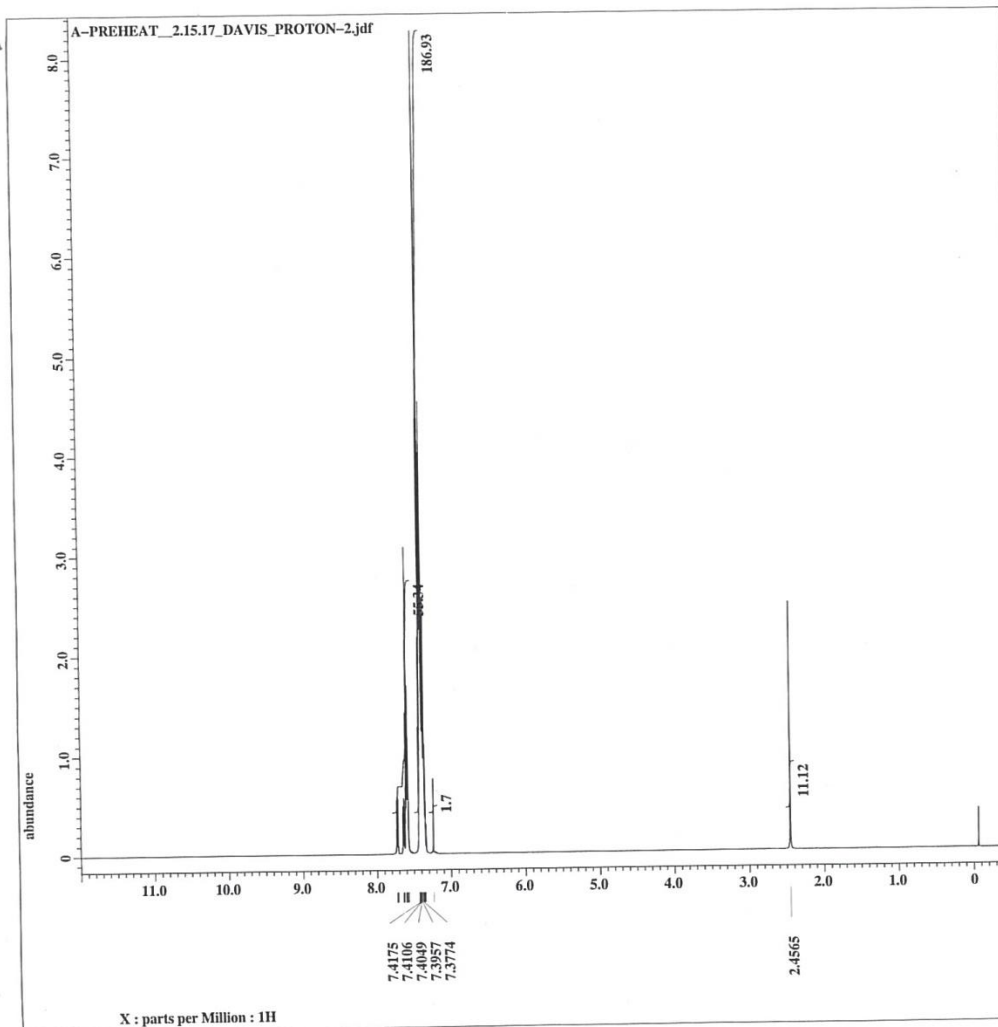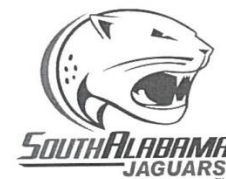

|                  |                             |
|------------------|-----------------------------|
| Filename         | = A-PREHEAT_2.15.17_DA      |
| Author           | = Jim Davis                 |
| Experiment       | = single_pulse.ex2          |
| Sample_id        | = A-PREHEAT_2.15.17_DA      |
| Solvent          | = CHLOROFORM-D              |
| Changer_sample   | = 17                        |
| Creation_time    | = 15-FEB-2017 17:07:25      |
| Revision_time    | = 15-FEB-2017 16:51:08      |
| Current_time     | = 15-FEB-2017 16:51:08      |
| Data_format      | = 1D COMPLEX                |
| Dim_size         | = 13107                     |
| Dim_title        | = 1H                        |
| Dim_units        | = [ppm]                     |
| Dimensions       | = X                         |
| Site             | = ECA 500                   |
| Spectrometer     | = JNM-ECA500                |
| Field_strength   | = 11.7473579 [T] (500 [MH]) |
| X_acq_duration   | = 1.74587904 [s]            |
| X_domain         | = 1H                        |
| X_freq           | = 500.15991521 [MHz]        |
| X_offset         | = 5.0 [ppm]                 |
| X_points         | = 16384                     |
| X_prescans       | = 1                         |
| X_resolution     | = 0.57277737 [Hz]           |
| X_sweep          | = 9.38438438 [kHz]          |
| Irr_domain       | = 1H                        |
| Irr_freq         | = 500.15991521 [MHz]        |
| Irr_offset       | = 5.0 [ppm]                 |
| Tri_domain       | = 1H                        |
| Tri_freq         | = 500.15991521 [MHz]        |
| Tri_offset       | = 5.0 [ppm]                 |
| Clipped          | = FALSE                     |
| Mod_return       | = 1                         |
| Scans            | = 16                        |
| Total_scans      | = 16                        |
| X_90_width       | = 13.07 [us]                |
| X_acq_time       | = 1.74587904 [s]            |
| X_angle          | = 45 [deg]                  |
| X_atn            | = 4 [dB]                    |
| X_pulse          | = 6.535 [us]                |
| Irr_mode         | = Off                       |
| Tri_mode         | = Off                       |
| Dante_preset     | = FALSE                     |
| Initial_wait     | = 1 [s]                     |
| Recvr_gain       | = 30                        |
| Relaxation_delay | = 4 [s]                     |
| Repetition_time  | = 5.74587904 [s]            |
| Temp_get         | = 21 [deg]                  |

PPN SAC ,  
IL # 6

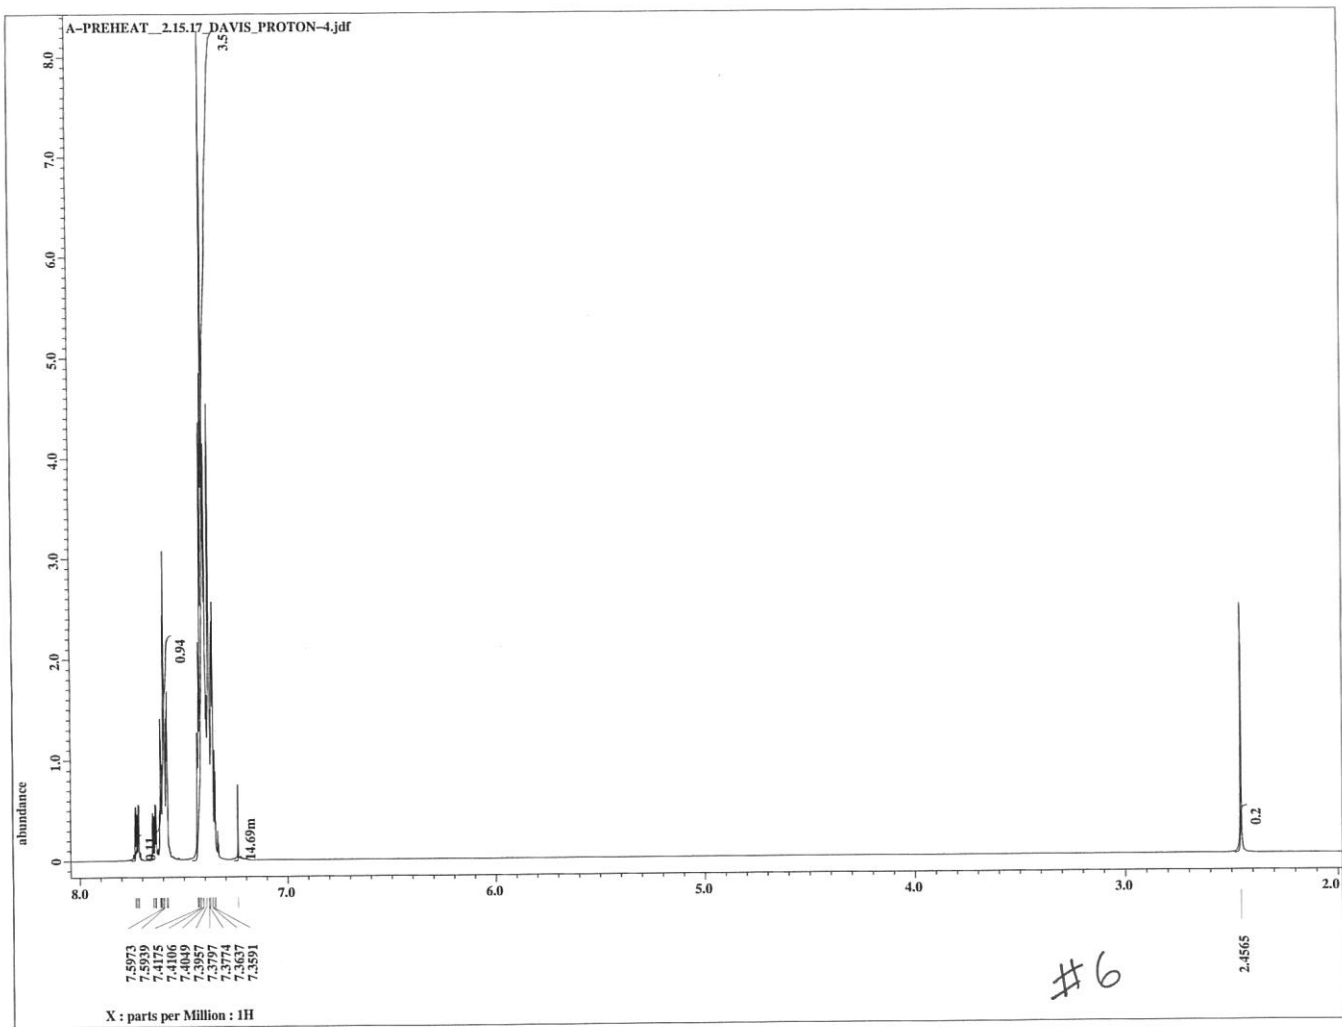

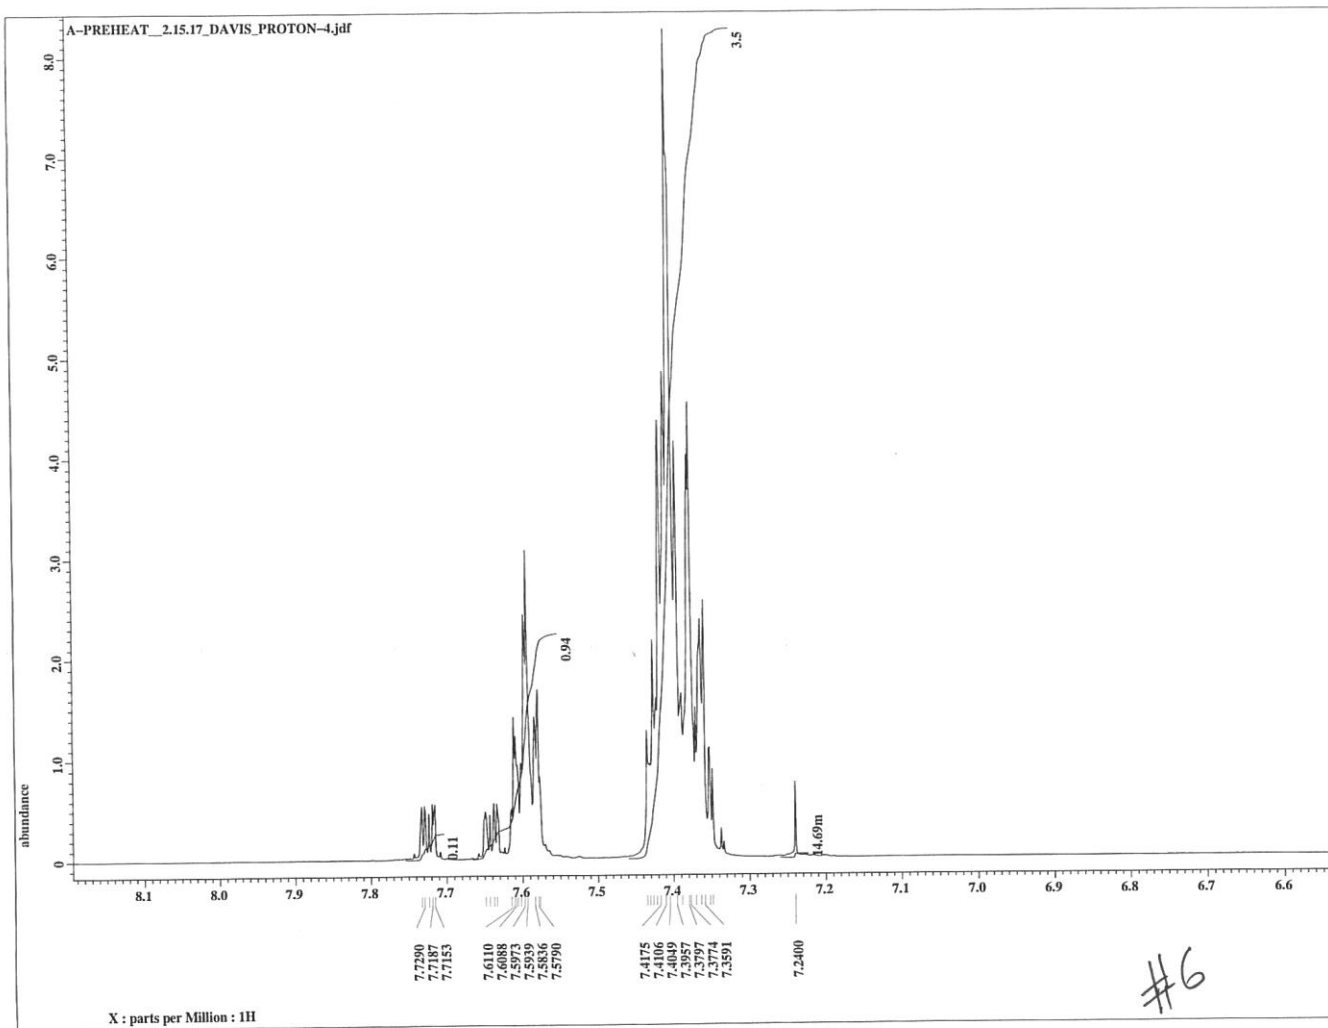

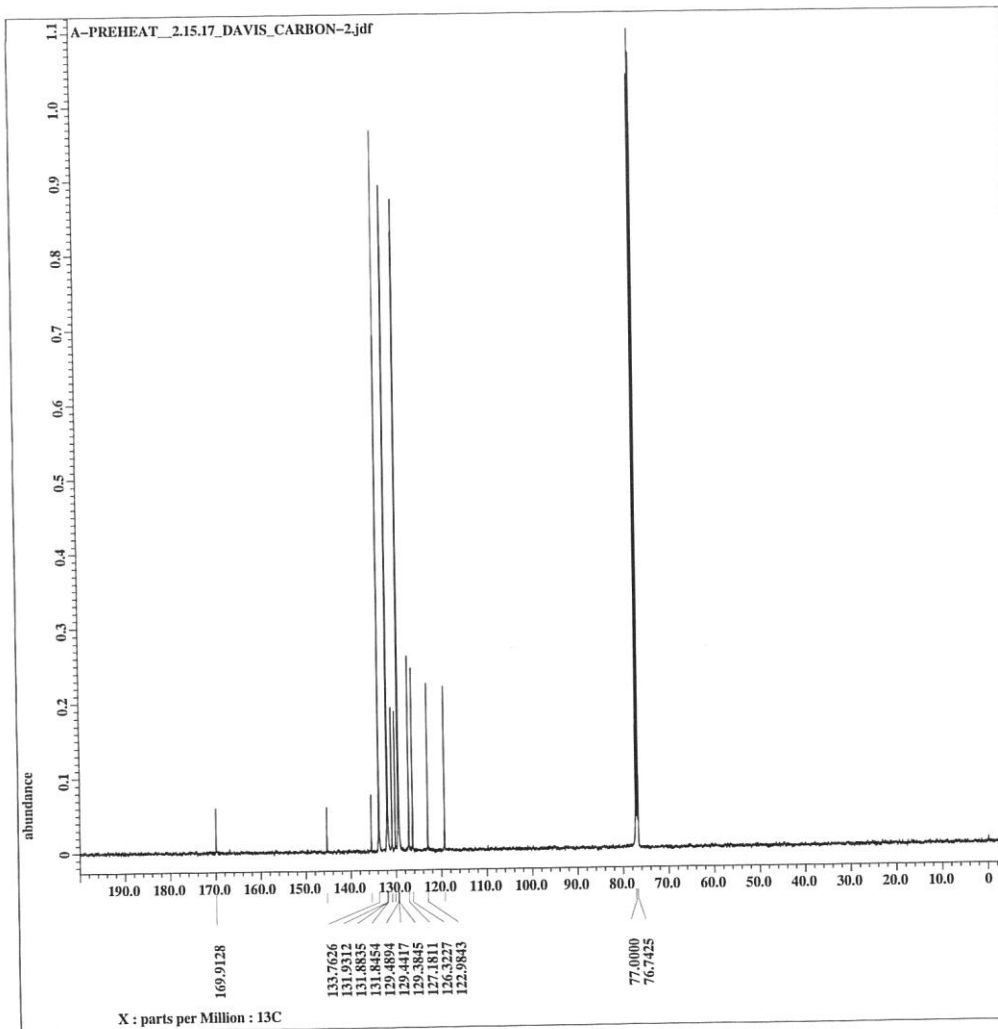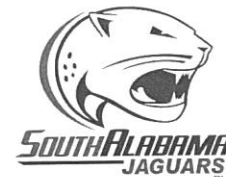

|                  |                           |
|------------------|---------------------------|
| Filename         | = A-PREHEAT_2.15.17_DA    |
| Author           | = Jim Davis               |
| Experiment       | = single_pulse_dec        |
| Sample_id        | = A-PREHEAT_2.15.17_DA    |
| Solvent          | = CHLOROFORM-D            |
| Changer_sample   | = 17                      |
| Creation_time    | = 15-FEB-2017 20:57:59    |
| Revision_time    | = 15-FEB-2017 20:41:40    |
| Current_time     | = 15-FEB-2017 20:41:42    |
| Data_format      | = 1D COMPLEX              |
| Dim_size         | = 26214                   |
| Dim_title        | = 13C                     |
| Dim_units        | = [ppm]                   |
| Dimensions       | = X                       |
| Site             | = ECA 500                 |
| Spectrometer     | = JNM-ECA500              |
| Field_strength   | = 11.7473579 [T] (500 [MH |
| X_acq_duration   | = 0.83361792 [s]          |
| X_domain         | = 13C                     |
| X_freq           | = 125.76529768 [MHz]      |
| X_offset         | = 100 [ppm]               |
| X_points         | = 32768                   |
| X_prescans       | = 4                       |
| X_resolution     | = 1.19959034 [Hz]         |
| X_sweep          | = 39.3081761 [kHz]        |
| Irr_domain       | = 1H                      |
| Irr_freq         | = 500.15991521 [MHz]      |
| Irr_offset       | = 5.0 [ppm]               |
| Clipped          | = FALSE                   |
| Mod_return       | = 1                       |
| Scans            | = 2000                    |
| Total_scans      | = 2000                    |
| X_90_width       | = 12.7 [us]               |
| X_acq_time       | = 0.83361792 [s]          |
| X_angle          | = 30 [deg]                |
| X_atn            | = 6 [dB]                  |
| X_pulse          | = 4.23333333 [us]         |
| Irr_atn_dec      | = 20.5 [dB]               |
| Irr_atn_poe      | = 20.5 [dB]               |
| Irr_noise        | = WALTZ                   |
| Decoupling       | = TRUE                    |
| Initial_wait     | = 1 [s]                   |
| Noe              | = TRUE                    |
| Noe_time         | = 2 [s]                   |
| Recvr_gain       | = 60                      |
| Relaxation_delay | = 2 [s]                   |
| Repetition_time  | = 2.83361792 [s]          |
| Temp_get         | = 21.1 [dC]               |

#6

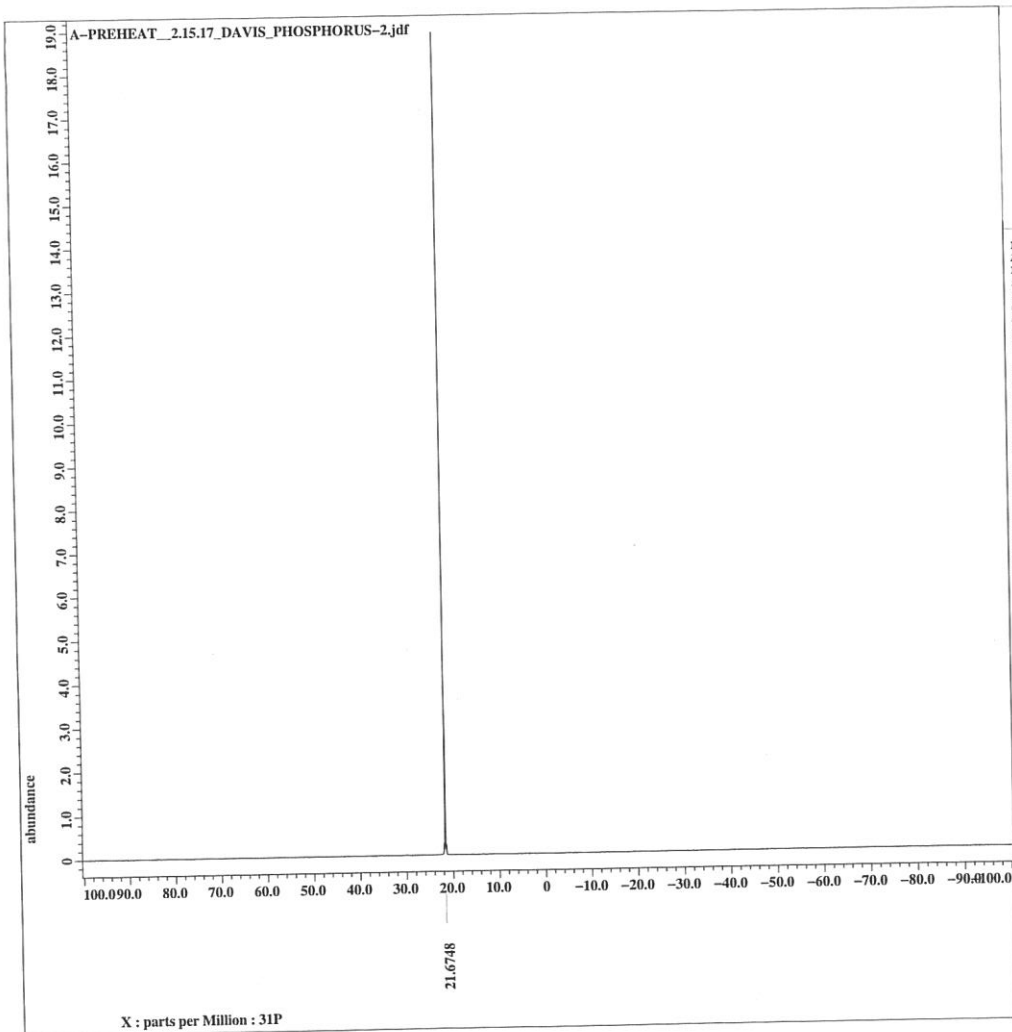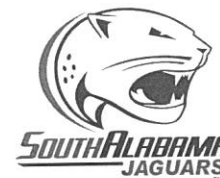

|                  |                         |
|------------------|-------------------------|
| Filename         | = A-PREHEAT_2.15.17_DA  |
| Author           | = Jim Davis             |
| Experiment       | = single_pulse_dec      |
| Sample_id        | = A-PREHEAT_2.15.17_DA  |
| Solvent          | = CHLOROFORM-D          |
| Changer_sample   | = 17                    |
| Creation_time    | = 15-FEB-2017 17:56:22  |
| Revision_time    | = 15-FEB-2017 17:40:05  |
| Current_time     | = 15-FEB-2017 17:40:05  |
| Data_format      | = 1D COMPLEX            |
| Dim_size         | = 26214                 |
| Dim_title        | = 31P                   |
| Dim_units        | = [ppm]                 |
| Dimensions       | = X                     |
| Site             | = ECA 500               |
| Spectrometer     | = JNM-ECA500            |
| Field_strength   | = 11.7473579[T] (500[MH |
| X_acq_duration   | = 0.64487424[s]         |
| X_domain         | = 31P                   |
| X_freq           | = 202.46831075[MHz]     |
| X_offset         | = 0[ppm]                |
| X_points         | = 32768                 |
| X_prescans       | = 4                     |
| X_resolution     | = 1.55068995[Hz]        |
| X_sweep          | = 50.81300813[kHz]      |
| Irr_domain       | = 1H                    |
| Irr_freq         | = 500.15991521[MHz]     |
| Irr_offset       | = 5.0[ppm]              |
| Clipped          | = FALSE                 |
| Mod_return       | = 1                     |
| Scans            | = 256                   |
| Total_scans      | = 256                   |
| X_90_width       | = 14.687[us]            |
| X_acq_time       | = 0.64487424[s]         |
| X_angle          | = 30[deg]               |
| X_atn            | = 5[db]                 |
| X_pulse          | = 4.89566667[us]        |
| Irr_atn_dec      | = 20.5[db]              |
| Irr_atn_noe      | = 20.5[db]              |
| Irr_noise        | = WALTZ                 |
| Decoupling       | = TRUE                  |
| Initial_wait     | = 1[s]                  |
| Noe              | = TRUE                  |
| Noe_time         | = 2[s]                  |
| Recvr_gain       | = 56                    |
| Relaxation_delay | = 2[s]                  |
| Repetition_time  | = 2.64487424[s]         |
| Temp_set         | = 21.4[dc]              |

#6





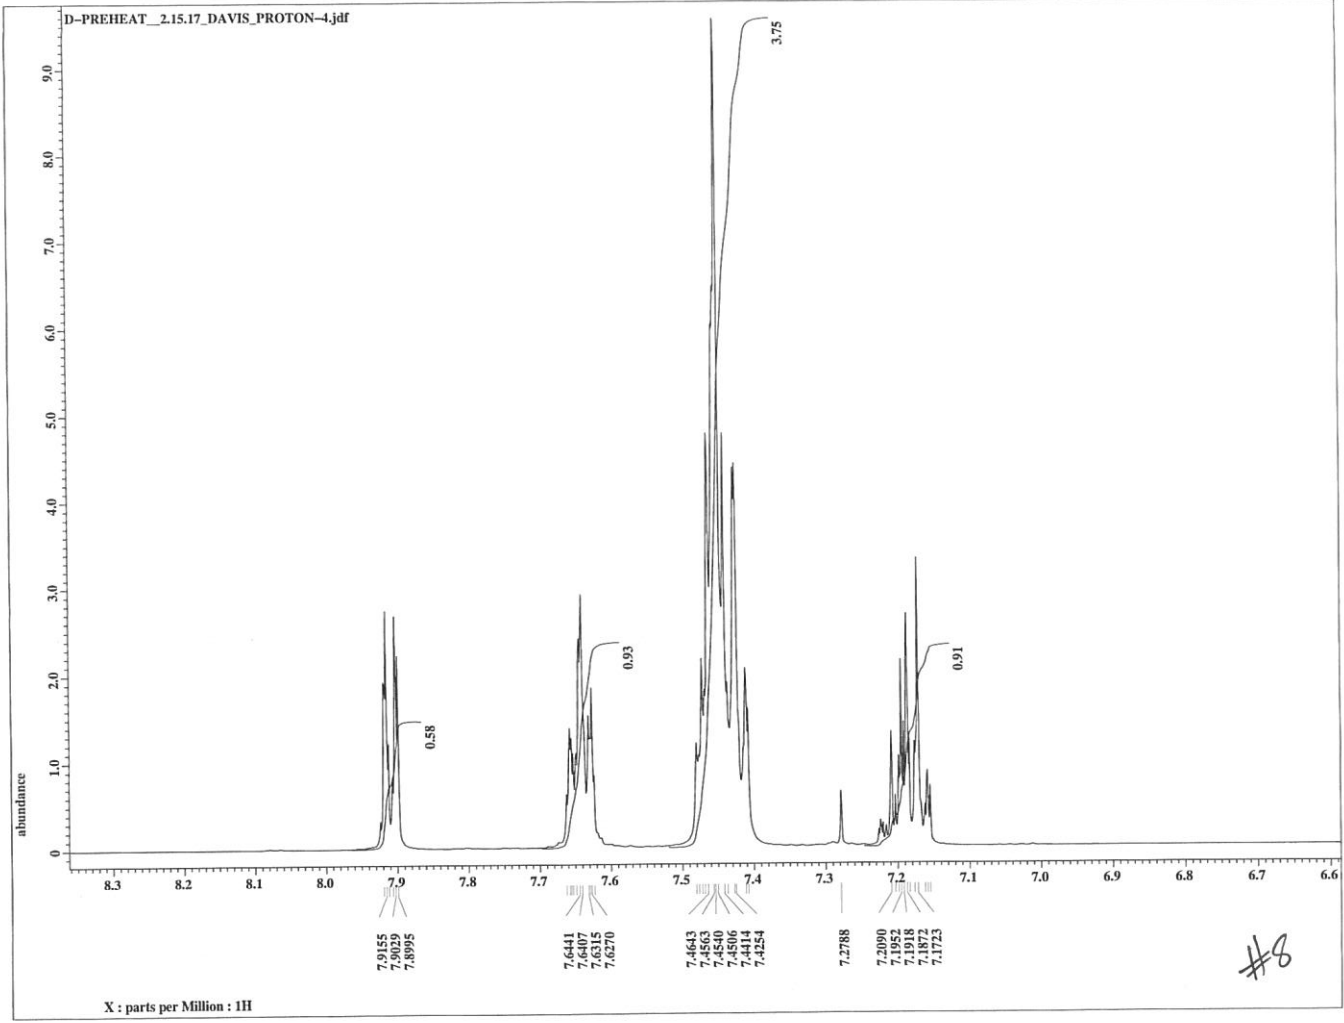

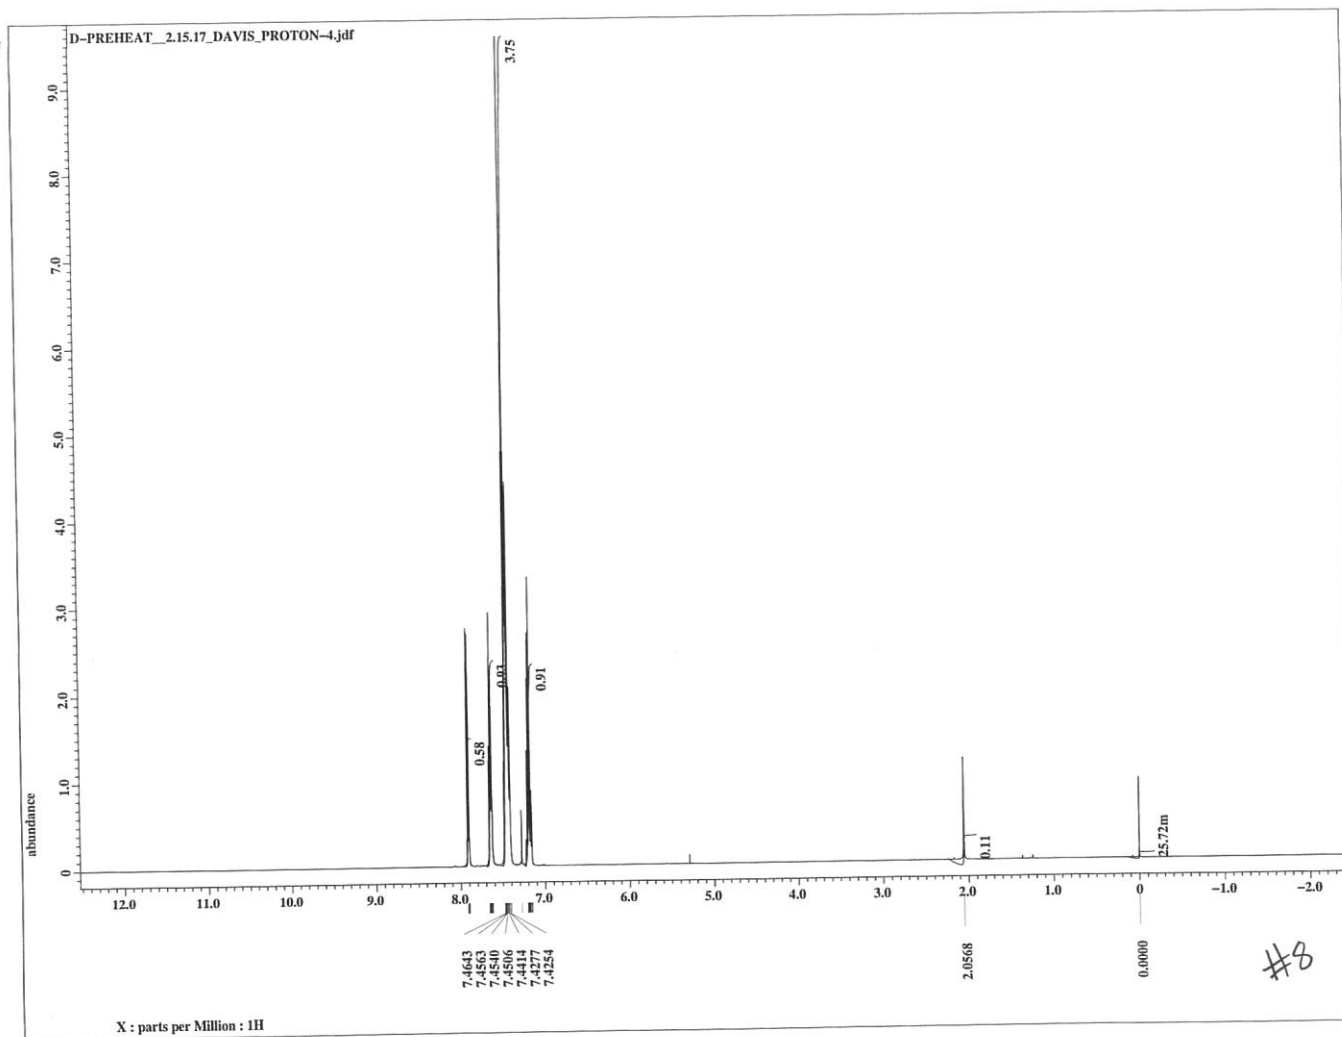

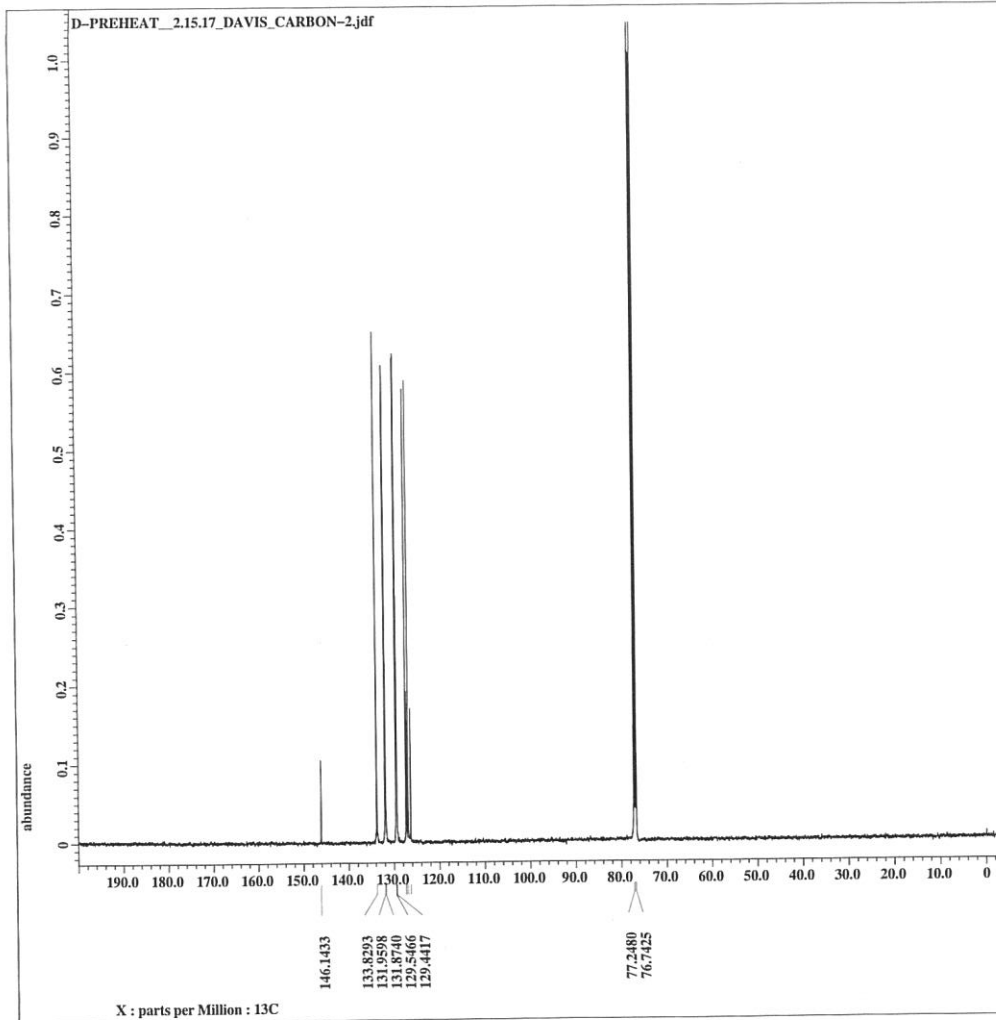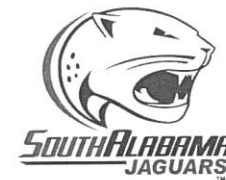

```

Filename      = D-PREHEAT_2.15.17_DA
Author       = Jim Davis
Experiment    = single_pulse_dec
Sample_id     = D-PREHEAT_2.15.17_DA
Solvent       = CHLOROFORM-D
Changer_sample = 20
Creation_time  = 16-FEB-2017 01:54:34
Revision_time = 16-FEB-2017 01:38:16
Current_time  = 16-FEB-2017 01:38:16

Data_format   = 1D COMPLEX
Dim_size      = 26214
Dim_title     = 13C
Dim_units     = [ppm]
Dimensions    = X
Site          = ECA 500
Spectrometer  = JNM-ECA500

Field_strength = 11.7473579[T] (500[MH
X_acq_duration = 0.83361792[s]
X_domain       = 13C
X_freq         = 125.76529768[MHz]
X_offset       = 100[ppm]
X_points       = 32768
X_prescans     = 4
X_resolution   = 1.19959034[Hz]
X_sweep        = 39.3081761[kHz]
Irr_domain     = 1H
Irr_freq       = 500.15991521[MHz]
Irr_offset     = 5.0[ppm]
Clipped        = FALSE
Mod_return     = 1
Scans          = 2000
Total_scans    = 2000

X_90_width     = 12.7[us]
X_acq_time     = 0.83361792[s]
X_angle        = 30[deg]
X_atn          = 6[db]
X_pulse        = 4.23333333[us]
Irr_atn_dec    = 20.5[db]
Irr_atn_noe    = 20.5[db]
Irr_noise      = WALTZ
Decoupling     = TRUE
Initial_wait   = 1[s]
Noe            = TRUE
Noe_time       = 2[s]
Recvr_gain     = 60
Relaxation_delay = 2[s]
Repetition_time = 2.83361792[s]
Temp_get       = 20.9[dc]
  
```

#8

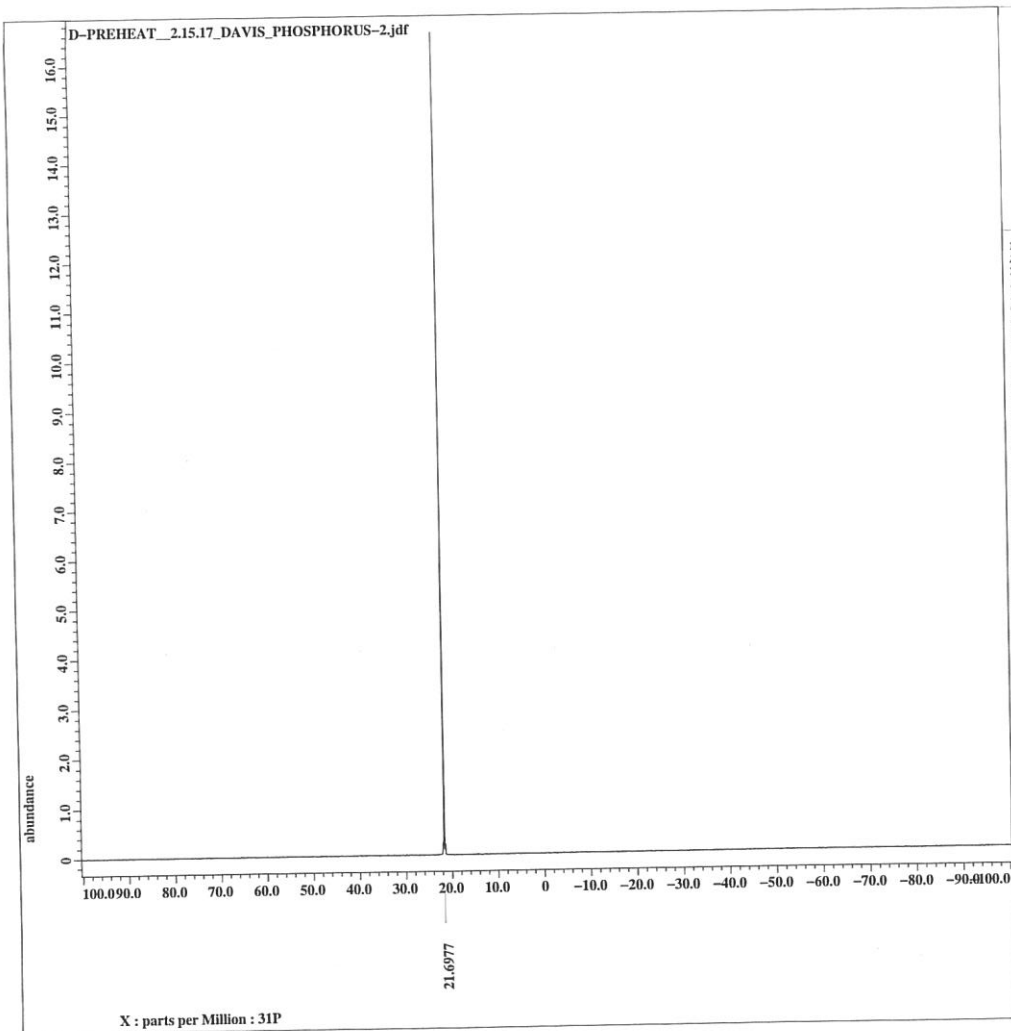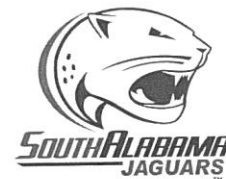

|                  |                           |
|------------------|---------------------------|
| Filename         | = D-PREHEAT_2.15.17_DA    |
| Author           | = Jim Davis               |
| Experiment       | = single_pulse_dec        |
| Sample_id        | = D-PREHEAT_2.15.17_DA    |
| Solvent          | = CHLOROFORM-D            |
| Changer_sample   | = 20                      |
| Creation_time    | = 15-FEB-2017 18:45:12    |
| Revision_time    | = 15-FEB-2017 18:28:55    |
| Current_time     | = 15-FEB-2017 18:28:55    |
| Data_format      | = 1D COMPLEX              |
| Dim_size         | = 26214                   |
| Dim_title        | = 31P                     |
| Dim_units        | = [ppm]                   |
| Dimensions       | = X                       |
| Site             | = ECA 500                 |
| Spectrometer     | = JNM-ECA500              |
| Field_strength   | = 11.7473579 [T] (500 [MH |
| X_acq_duration   | = 0.64487424 [s]          |
| X_domain         | = 31P                     |
| X_freq           | = 202.46831075 [MHz]      |
| X_offset         | = 0 [ppm]                 |
| X_points         | = 32768                   |
| X_prescans       | = 4                       |
| X_resolution     | = 1.55068995 [Hz]         |
| X_sweep          | = 50.81300813 [kHz]       |
| Irr_domain       | = 1H                      |
| Irr_freq         | = 500.15991521 [MHz]      |
| Irr_offset       | = 5.0 [ppm]               |
| Clipped          | = FALSE                   |
| Mod_return       | = 1                       |
| Scans            | = 256                     |
| Total_scans      | = 256                     |
| X_90_width       | = 14.687 [us]             |
| X_acq_time       | = 0.64487424 [s]          |
| X_angle          | = 30 [deg]                |
| X_atn            | = 5 [dB]                  |
| X_pulse          | = 4.89566667 [us]         |
| Irr_atn_dec      | = 20.5 [dB]               |
| Irr_atn_poe      | = 20.5 [dB]               |
| Irr_noise        | = WALTZ                   |
| Decoupling       | = TRUE                    |
| Initial_wait     | = 1 [s]                   |
| Noe              | = TRUE                    |
| Noe_time         | = 2 [s]                   |
| Recvr_gain       | = 58                      |
| Relaxation_delay | = 2 [s]                   |
| Repetition_time  | = 2.64487424 [s]          |
| Temp_set         | = 21.3 [dc]               |

#8

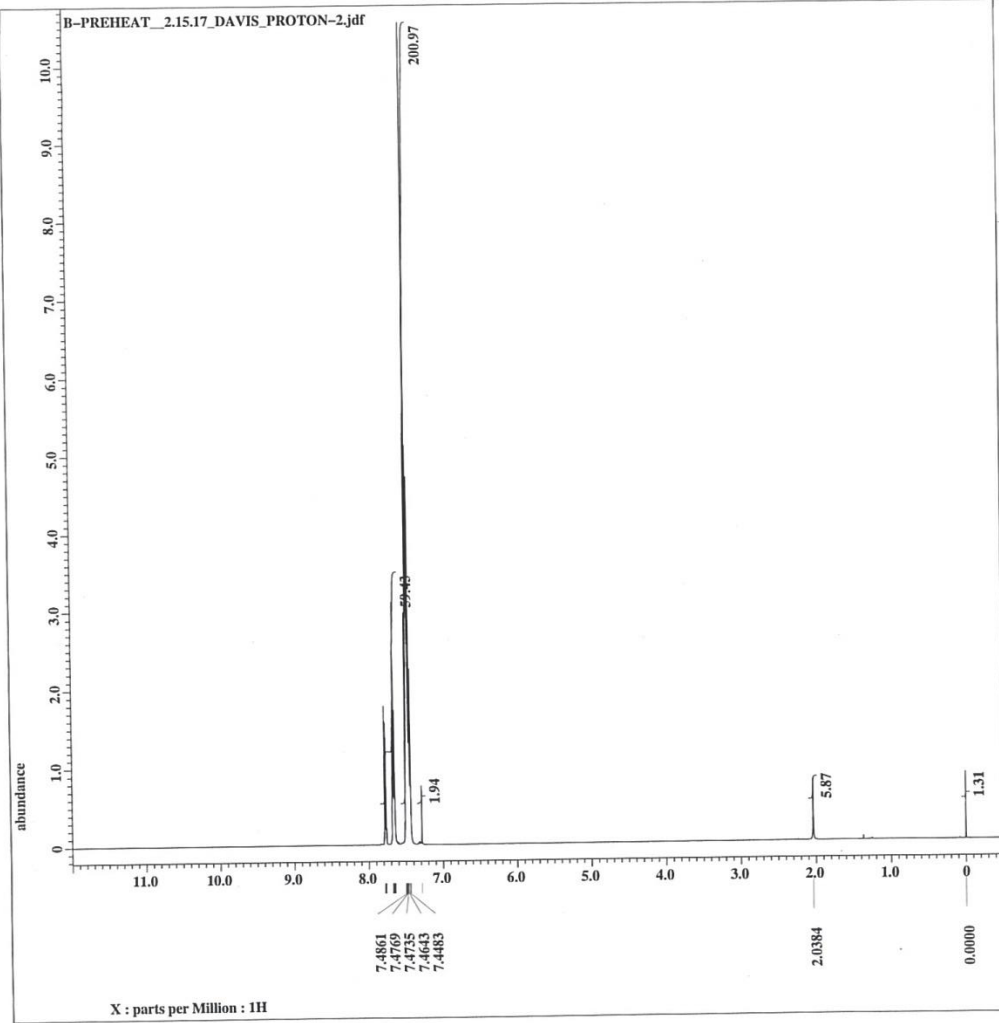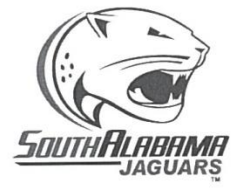

Filename = B-PREHEAT\_2.15.17\_DA  
Author = Jim Davis  
Experiment = single\_pulse.ex2  
Sample\_id = B-PREHEAT\_2.15.17\_DA  
Solvent = CHLOROFORM-D  
Changer\_sample = 18  
Creation\_time = 15-FEB-2017 17:13:37  
Revision\_time = 15-FEB-2017 16:57:20  
Current\_time = 15-FEB-2017 16:57:20

Data\_format = 1D COMPLEX  
Dim\_size = 13107  
Dim\_title = 1H  
Dim\_units = [ppm]  
Dimensions = X  
Site = ECA 500  
Spectrometer = JNM-ECA500

Field\_strength = 11.7473579 [T] (500 [MH]  
X\_acq\_duration = 1.74587904 [s]  
X\_domain = 1H  
X\_freq = 500.15991521 [MHz]  
X\_offset = 5.0 [ppm]  
X\_points = 16384  
X\_prescans = 1  
X\_resolution = 0.57277737 [Hz]  
X\_sweep = 9.38438438 [kHz]  
Irr\_domain = 1H  
Irr\_freq = 500.15991521 [MHz]  
Irr\_offset = 5.0 [ppm]  
Tri\_domain = 1H  
Tri\_freq = 500.15991521 [MHz]  
Tri\_offset = 5.0 [ppm]  
Clipped = FALSE  
Mod\_return = 1  
Scans = 16  
Total\_scans = 16

X\_90\_width = 13.07 [us]  
X\_acq\_time = 1.74587904 [s]  
X\_angle = 45 [deg]  
X\_atn = 4 [dB]  
X\_pulse = 6.535 [us]  
Irr\_mode = Off  
Tri\_mode = Off  
Dante\_preset = FALSE  
Initial\_wait = 1 [s]  
Recvr\_gain = 32  
Relaxation\_delay = 4 [s]  
Repetition\_time = 5.74587904 [s]  
Temp\_get = 20.9 [dc]

PPN BDSA,  
IL#10

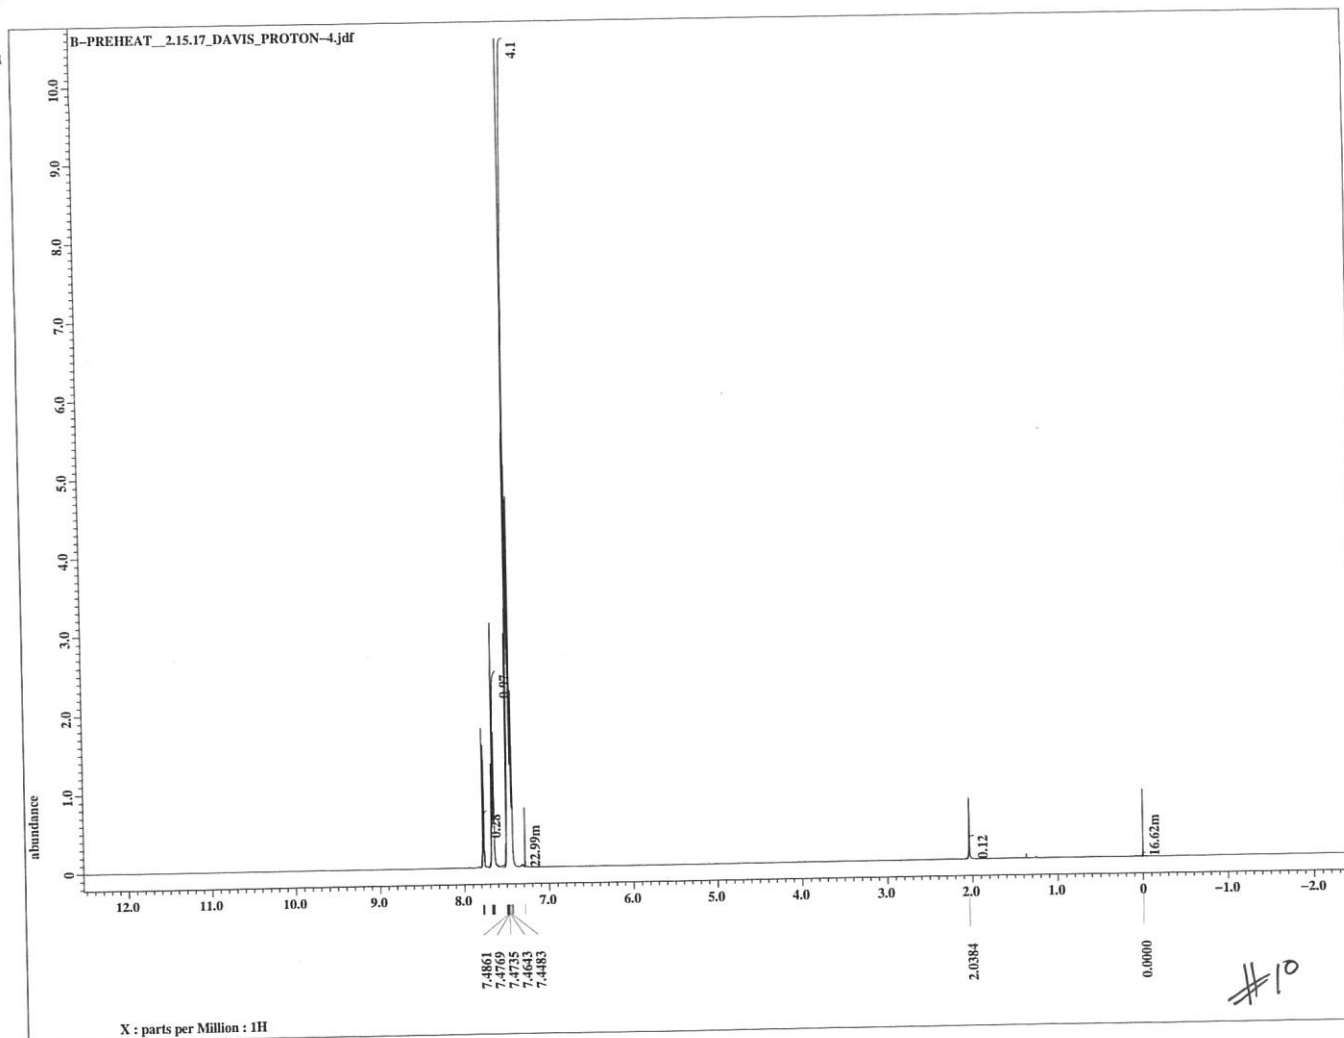

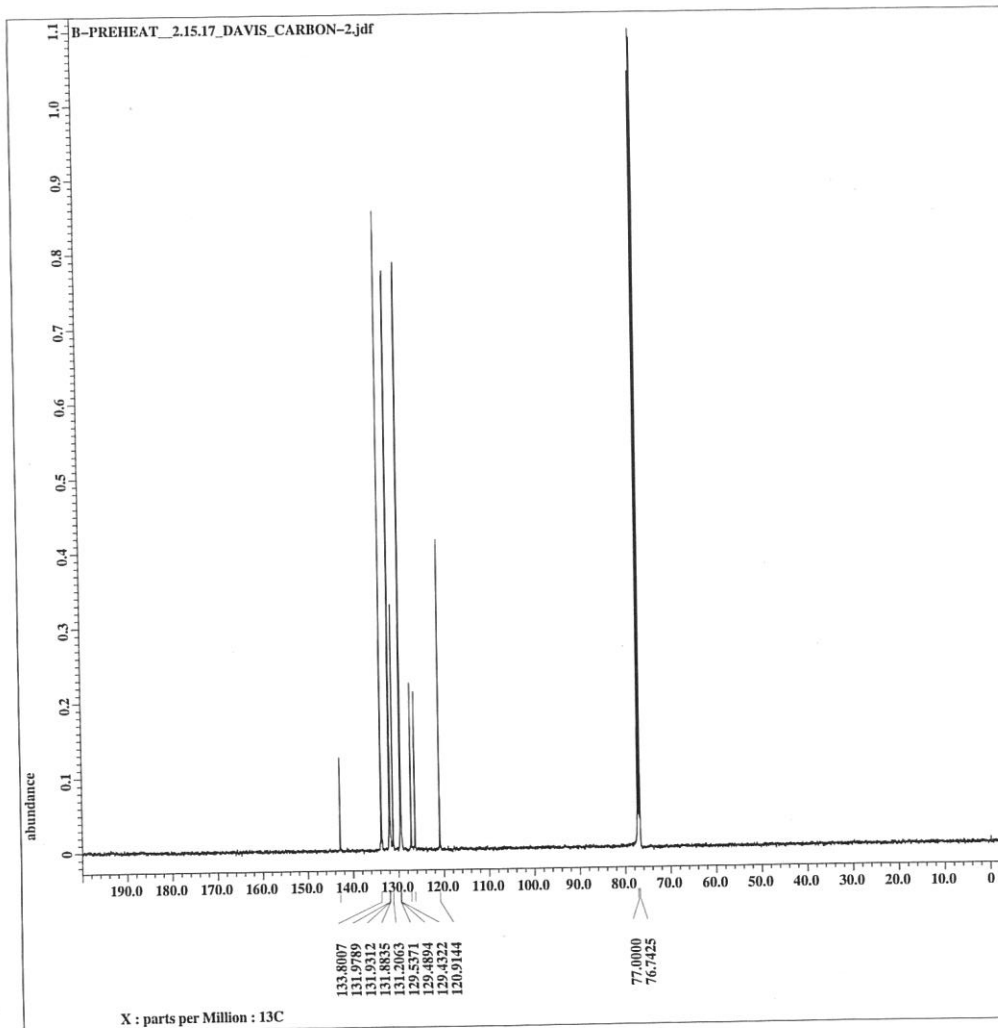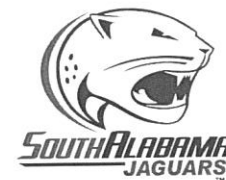

|                  |                           |
|------------------|---------------------------|
| Filename         | = B-PREHEAT_2.15.17_DA    |
| Author           | = Jim Davis               |
| Experiment       | = single_pulse_dec        |
| Sample_id        | = B-PREHEAT_2.15.17_DA    |
| Solvent          | = CHLOROFORM-D            |
| Changer_sample   | = 18                      |
| Creation_time    | = 15-FEB-2017 22:36:56    |
| Revision_time    | = 15-FEB-2017 22:20:38    |
| Current_time     | = 15-FEB-2017 22:20:38    |
| Data_format      | = 1D COMPLEX              |
| Dim_size         | = 26214                   |
| Dim_title        | = 13C                     |
| Dim_units        | = [ppm]                   |
| Dimensions       | = X                       |
| Site             | = ECA 500                 |
| Spectrometer     | = JNM-ECA500              |
| Field_strength   | = 11.7473579 [T] (500 [MH |
| X_acq_duration   | = 0.83361792 [s]          |
| X_domain         | = 13C                     |
| X_freq           | = 125.76529768 [MHz]      |
| X_offset         | = 100 [ppm]               |
| X_points         | = 32768                   |
| X_prescans       | = 4                       |
| X_resolution     | = 1.19959034 [Hz]         |
| X_sweep          | = 39.3081761 [MHz]        |
| Irr_domain       | = 1H                      |
| Irr_freq         | = 500.15991521 [MHz]      |
| Irr_offset       | = 5.0 [ppm]               |
| Clipped          | = FALSE                   |
| Mod_return       | = 1                       |
| Scans            | = 2000                    |
| Total_scans      | = 2000                    |
| X_90_width       | = 12.7 [us]               |
| X_acq_time       | = 0.83361792 [s]          |
| X_angle          | = 30 [deg]                |
| X_atn            | = 6 [dB]                  |
| X_pulse          | = 4.23333333 [us]         |
| Irr_atn_dec      | = 20.5 [dB]               |
| Irr_atn_noe      | = 20.5 [dB]               |
| Irr_noise        | = WALTZ                   |
| Decoupling       | = TRUE                    |
| Initial_wait     | = 1 [s]                   |
| Noe              | = TRUE                    |
| Noe_time         | = 2 [s]                   |
| Recvr_gain       | = 60                      |
| Relaxation_delay | = 2 [s]                   |
| Repetition_time  | = 2.83361792 [s]          |
| Temp_get         | = 20.9 [dc]               |

#10



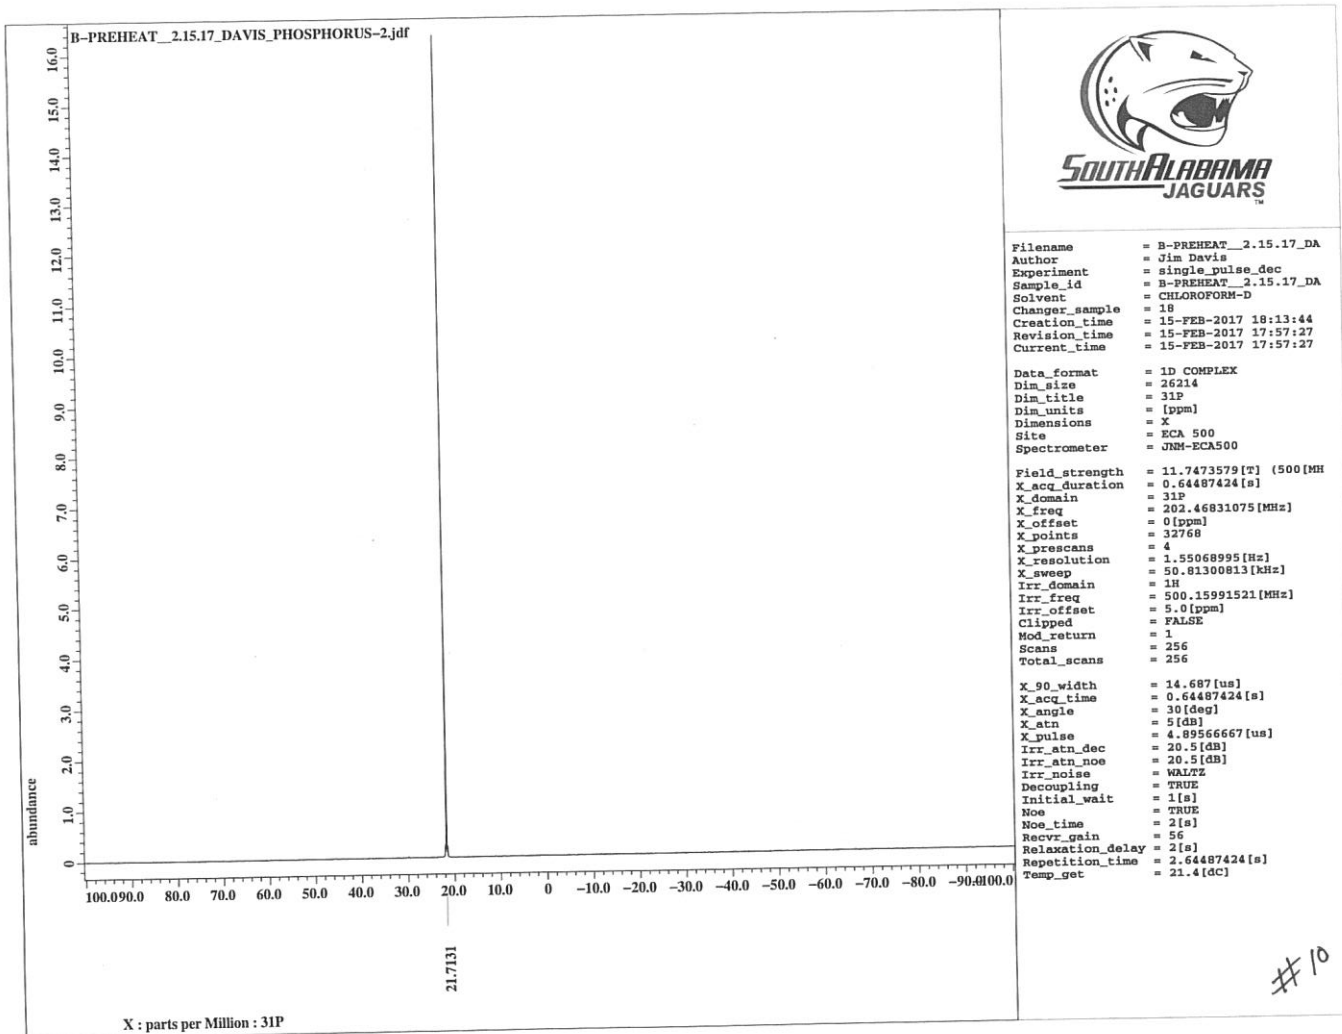

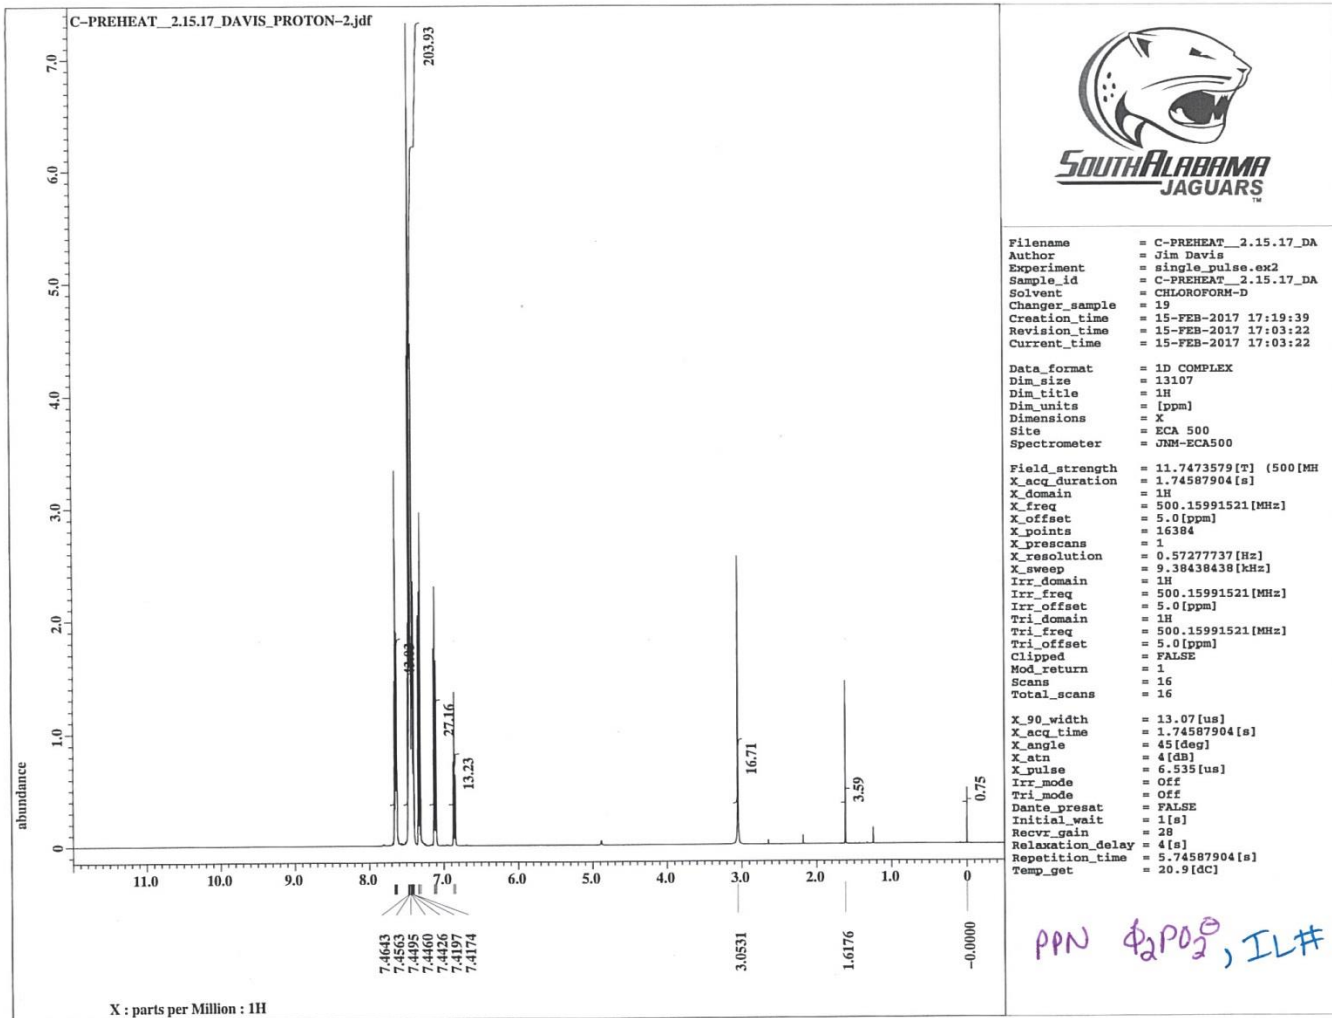

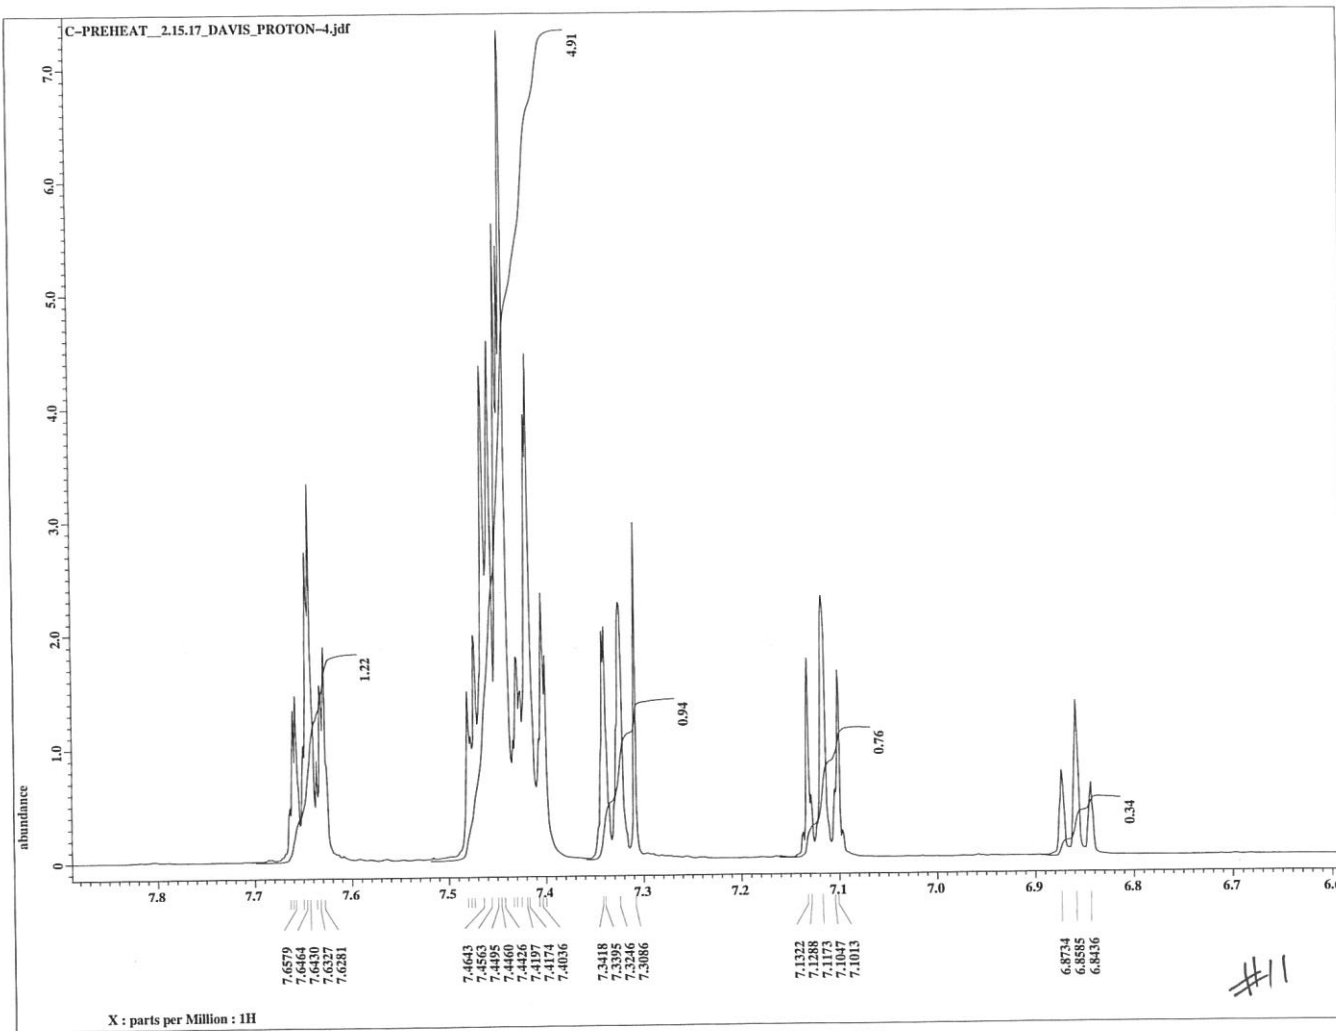

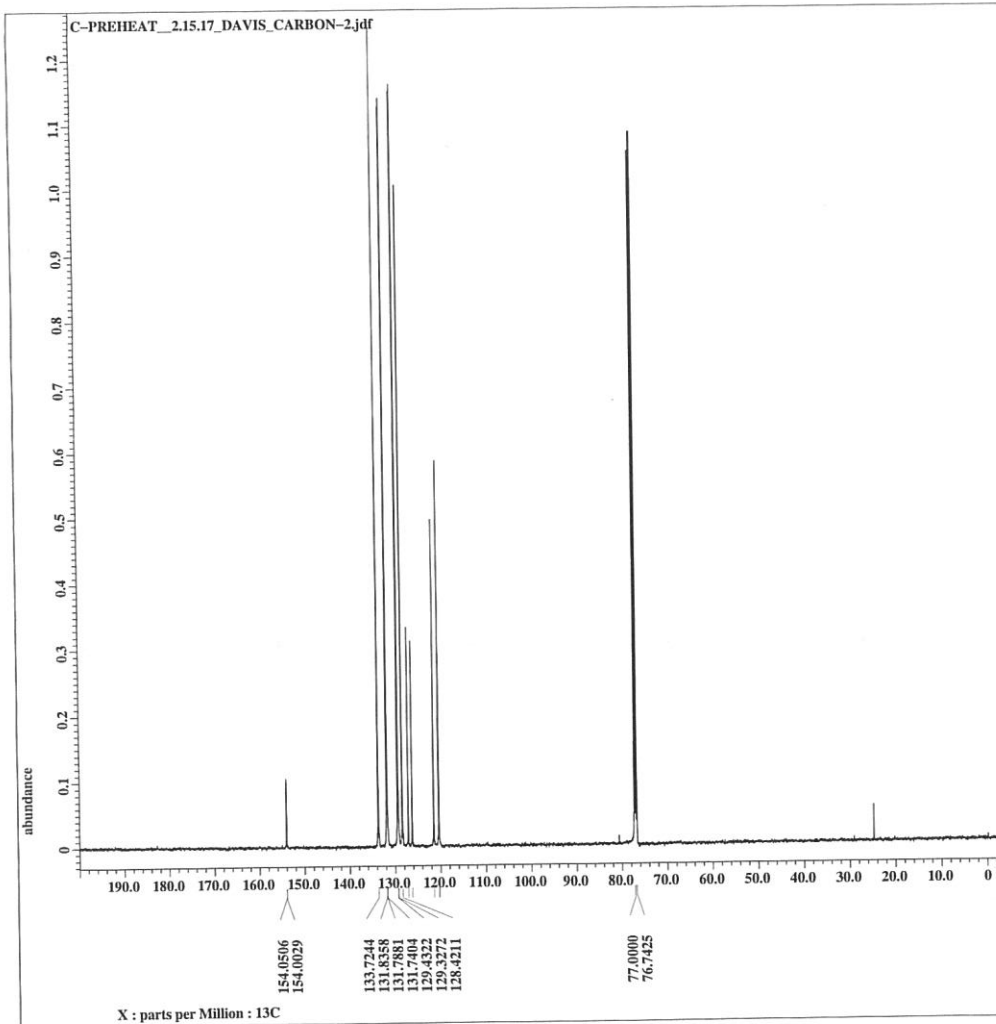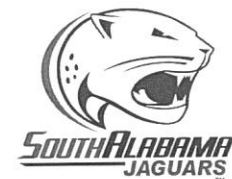

|                  |                           |
|------------------|---------------------------|
| Filename         | = C-PREHEAT_2.15.17_DA    |
| Author           | = Jim Davis               |
| Experiment       | = single_pulse_dec        |
| Sample_id        | = C-PREHEAT_2.15.17_DA    |
| Solvent          | = CHLOROFORM-D            |
| Changer_sample   | = 19                      |
| Creation_time    | = 16-FEB-2017 00:15:40    |
| Revision_time    | = 15-FEB-2017 23:59:22    |
| Current_time     | = 15-FEB-2017 23:59:22    |
| Data_format      | = 1D COMPLEX              |
| Dim_size         | = 26214                   |
| Dim_title        | = 13C                     |
| Dim_units        | = [ppm]                   |
| Dimensions       | = X                       |
| Site             | = ECA 500                 |
| Spectrometer     | = JNM-ECA500              |
| Field_strength   | = 11.7473579 [T] (500 [MH |
| X_acq_duration   | = 0.83361792 [s]          |
| X_domain         | = 13C                     |
| X_freq           | = 125.76529768 [MHz]      |
| X_offset         | = 100 [ppm]               |
| X_points         | = 32768                   |
| X_prescans       | = 4                       |
| X_resolution     | = 1.19959034 [Hz]         |
| X_sweep          | = 39.3081761 [kHz]        |
| Irr_domain       | = 1H                      |
| Irr_freq         | = 500.15991521 [MHz]      |
| Irr_offset       | = 5.0 [ppm]               |
| Clipped          | = FALSE                   |
| Mod_return       | = 1                       |
| Scans            | = 2000                    |
| Total_scans      | = 2000                    |
| X_90_width       | = 12.7 [us]               |
| X_acq_time       | = 0.83361792 [s]          |
| X_angle          | = 30 [deg]                |
| X_atn            | = 6 [dB]                  |
| X_pulse          | = 4.23333333 [us]         |
| Irr_atn_dec      | = 20.5 [dB]               |
| Irr_atn_noe      | = 20.5 [dB]               |
| Irr_noise        | = WAL/TZ                  |
| Decoupling       | = TRUE                    |
| Initial_wait     | = 1 [s]                   |
| Noe              | = TRUE                    |
| Noe_time         | = 2 [s]                   |
| Recvr_gain       | = 60                      |
| Relaxation_delay | = 2 [s]                   |
| Repetition_time  | = 2.83361792 [s]          |
| Temp_set         | = 21 [dc]                 |

#11

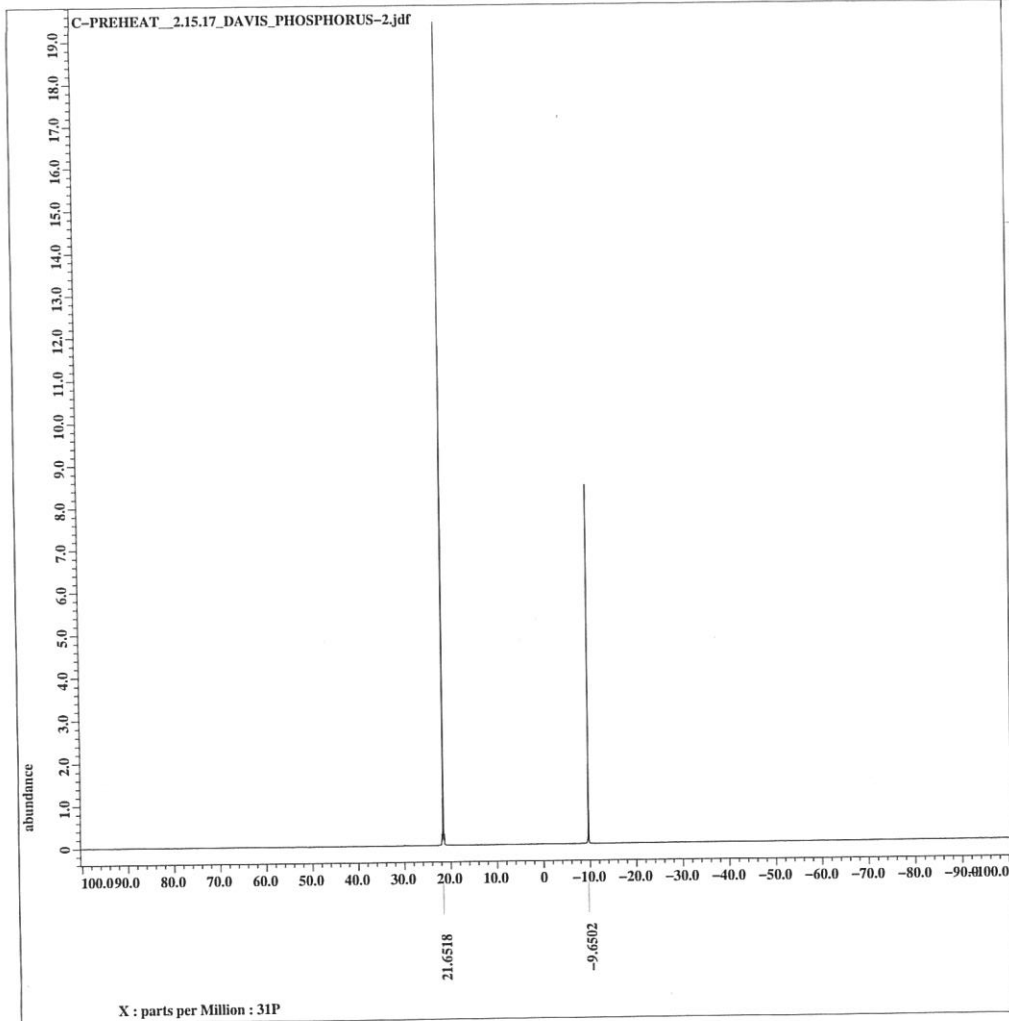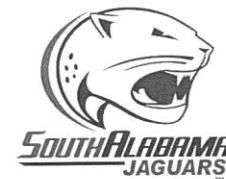

|                  |                             |
|------------------|-----------------------------|
| Filename         | = C-PREHEAT_2.15.17_DA      |
| Author           | = Jim Davis                 |
| Experiment       | = single_pulse_dec          |
| Sample_id        | = C-PREHEAT_2.15.17_DA      |
| Solvent          | = CHLOROFORM-D              |
| Changer_sample   | = 19                        |
| Creation_time    | = 15-FEB-2017 18:29:20      |
| Revision_time    | = 15-FEB-2017 18:13:03      |
| Current_time     | = 15-FEB-2017 18:13:03      |
| Data_format      | = 1D COMPLEX                |
| Dim_size         | = 26214                     |
| Dim_title        | = 31P                       |
| Dim_units        | = [ppm]                     |
| Dimensions       | = X                         |
| Site             | = ECA 500                   |
| Spectrometer     | = JNM-ECA500                |
| Field_strength   | = 11.7473579 [T] (500 [MH]) |
| X_acq_duration   | = 0.64487424 [s]            |
| X_domain         | = 31P                       |
| X_freq           | = 202.46831075 [MHz]        |
| X_offset         | = 0 [ppm]                   |
| X_points         | = 32768                     |
| X_prescans       | = 4                         |
| X_resolution     | = 1.55068995 [Hz]           |
| X_sweep          | = 50.81300813 [kHz]         |
| Irr_domain       | = 1H                        |
| Irr_freq         | = 500.15991521 [MHz]        |
| Irr_offset       | = 5.0 [ppm]                 |
| Clipped          | = FALSE                     |
| Mod_return       | = 1                         |
| Scans            | = 256                       |
| Total_scans      | = 256                       |
| X_90_width       | = 14.687 [us]               |
| X_acq_time       | = 0.64487424 [s]            |
| X_angle          | = 30 [deg]                  |
| X_atn            | = 5 [dB]                    |
| X_pulse          | = 4.89566667 [us]           |
| Irr_atn_dec      | = 20.5 [dB]                 |
| Irr_atn_poe      | = 20.5 [dB]                 |
| Irr_noise        | = WALTZ                     |
| Decoupling       | = TRUE                      |
| Initial_wait     | = 1 [s]                     |
| Noe              | = TRUE                      |
| Noe_time         | = 2 [s]                     |
| Recvr_gain       | = 54                        |
| Relaxation_delay | = 2 [s]                     |
| Repetition_time  | = 2.64487424 [s]            |
| Temp_get         | = 21.4 [dc]                 |

#11

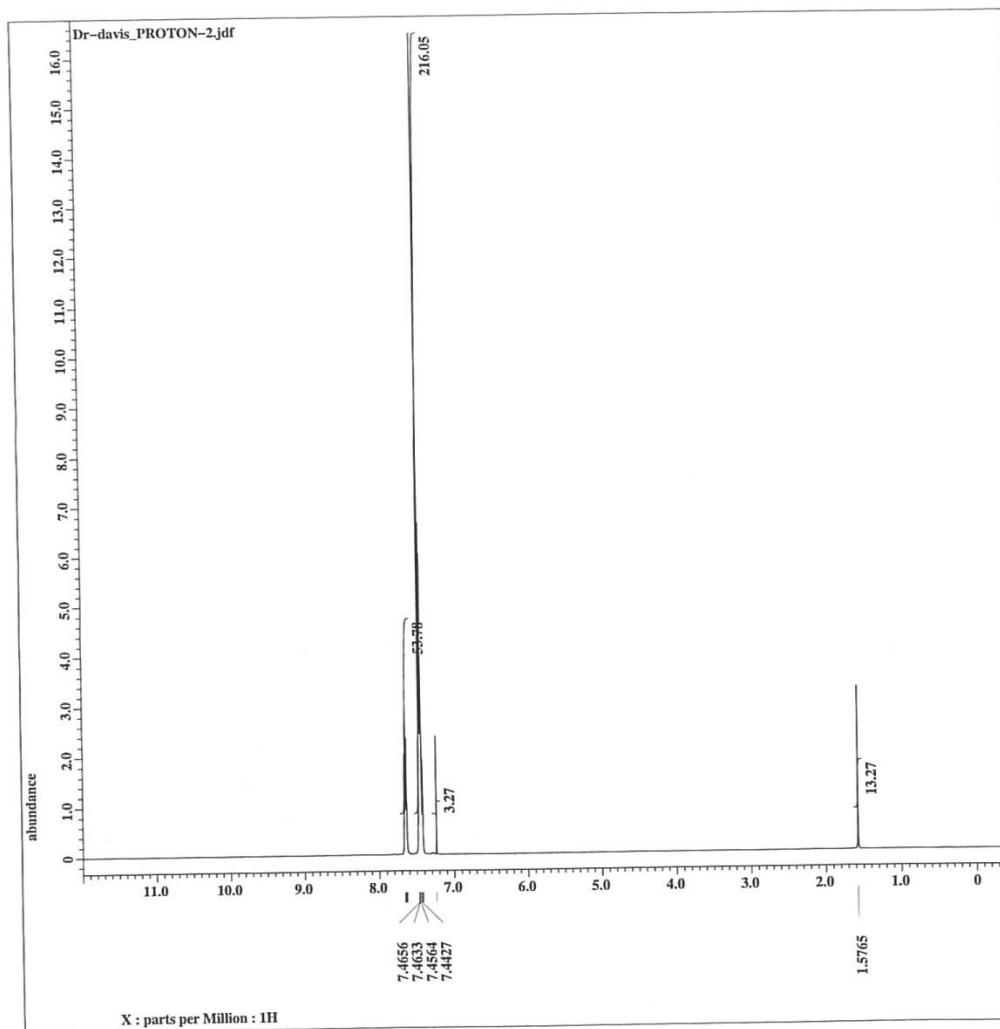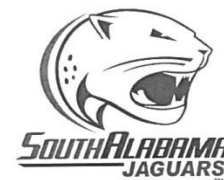

|                  |                           |
|------------------|---------------------------|
| Filename         | = Dr-davis_PROTON-2.jdf   |
| Author           | = Jim Davis               |
| Experiment       | = single_pulse.ex2        |
| Sample_id        | = Dr-davis                |
| Solvent          | = CHLOROFORM-D            |
| Changer_sample   | = 6                       |
| Creation_time    | = 22-MAY-2017 11:28:29    |
| Revision_time    | = 22-MAY-2017 11:05:52    |
| Current_time     | = 22-MAY-2017 11:05:52    |
| Data_format      | = 1D COMPLEX              |
| Dim_size         | = 13107                   |
| Dim_title        | = 1H                      |
| Dim_units        | = [ppm]                   |
| Dimensions       | = X                       |
| Site             | = ECA 500                 |
| Spectrometer     | = JNM-ECA500              |
| Field_strength   | = 11.7473579 [T] (500 [MH |
| X_acq_duration   | = 1.74587904 [s]          |
| X_domain         | = 1H                      |
| X_freq           | = 500.15991521 [MHz]      |
| X_offset         | = 5.0 [ppm]               |
| X_points         | = 16384                   |
| X_prescans       | = 1                       |
| X_resolution     | = 0.57277737 [Hz]         |
| X_sweep          | = 9.38438438 [kHz]        |
| Irr_domain       | = 1H                      |
| Irr_freq         | = 500.15991521 [MHz]      |
| Irr_offset       | = 5.0 [ppm]               |
| Tri_domain       | = 1H                      |
| Tri_freq         | = 500.15991521 [MHz]      |
| Tri_offset       | = 5.0 [ppm]               |
| Clipped          | = FALSE                   |
| Mod_return       | = 1                       |
| Scans            | = 16                      |
| Total_scans      | = 16                      |
| X_90_width       | = 13.07 [us]              |
| X_acq_time       | = 1.74587904 [s]          |
| X_angle          | = 45 [deg]                |
| X_atn            | = 4 [dB]                  |
| X_pulse          | = 6.535 [us]              |
| Irr_mode         | = Off                     |
| Tri_mode         | = Off                     |
| Dante_preset     | = FALSE                   |
| Initial_wait     | = 1 [s]                   |
| Recvr_gain       | = 42                      |
| Relaxation_delay | = 4 [s]                   |
| Repetition_time  | = 5.74587904 [s]          |
| Temp_set         | = 21.9 [dC]               |

PNP<sup>+</sup> B(CN)<sub>4</sub><sup>-</sup>

#14

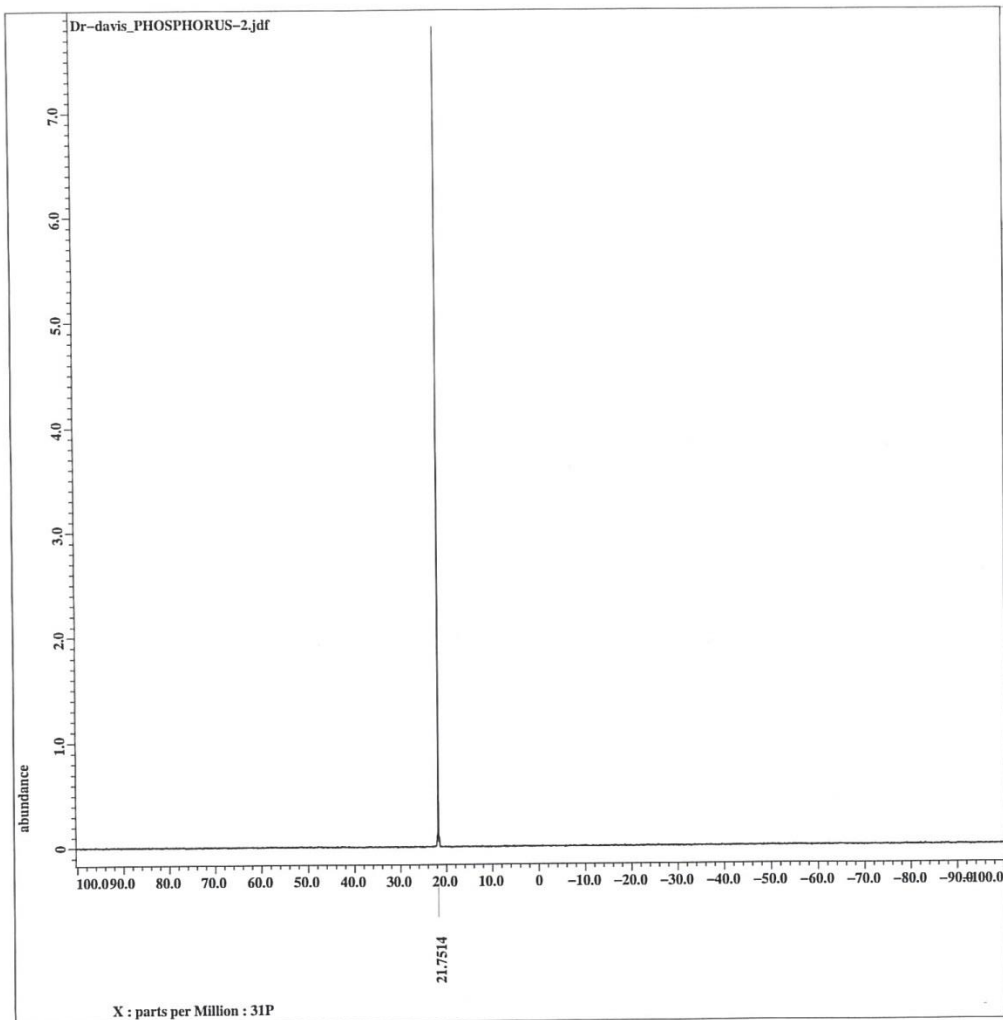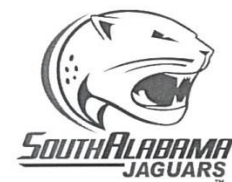

|                  |                           |
|------------------|---------------------------|
| Filename         | = Dr-davis_PHOSPHORUS-2   |
| Author           | = Jim Davis               |
| Experiment       | = single_pulse_dec        |
| Sample_id        | = Dr-davis                |
| Solvent          | = CHLOROFORM-D            |
| Changer_sample   | = 6                       |
| Creation_time    | = 22-MAY-2017 11:25:00    |
| Revision_time    | = 22-MAY-2017 11:02:24    |
| Current_time     | = 22-MAY-2017 11:02:24    |
| Data_format      | = 1D COMPLEX              |
| Dim_size         | = 26214                   |
| Dim_title        | = 31P                     |
| Dim_units        | = [ppm]                   |
| Dimensions       | = X                       |
| Site             | = ECA 500                 |
| Spectrometer     | = JNM-ECA500              |
| Field_strength   | = 11.7473579 [T] (500 [MH |
| X_acq_duration   | = 0.64487424 [s]          |
| X_domain         | = 31P                     |
| X_freq           | = 202.46831075 [MHz]      |
| X_offset         | = 0 [ppm]                 |
| X_points         | = 32768                   |
| X_prescans       | = 4                       |
| X_resolution     | = 1.55068995 [Hz]         |
| X_sweep          | = 50.81300813 [kHz]       |
| Irr_domain       | = 1H                      |
| Irr_freq         | = 500.15991521 [MHz]      |
| Irr_offset       | = 5.0 [ppm]               |
| Clipped          | = FALSE                   |
| Mod_return       | = 1                       |
| Scans            | = 256                     |
| Total_scans      | = 256                     |
| X_90_width       | = 14.687 [us]             |
| X_acq_time       | = 0.64487424 [s]          |
| X_angle          | = 30 [deg]                |
| X_atn            | = 5 [dB]                  |
| X_pulse          | = 4.89566667 [us]         |
| Irr_atn_dec      | = 20.5 [dB]               |
| Irr_atn_noe      | = 20.5 [dB]               |
| Irr_noise        | = WALZ                    |
| Decoupling       | = TRUE                    |
| Initial_wait     | = 1 [s]                   |
| Noe              | = TRUE                    |
| Noe_time         | = 2 [s]                   |
| Recvr_gain       | = 58                      |
| Relaxation_delay | = 2 [s]                   |
| Repetition_time  | = 2.64487424 [s]          |
| Temp_get         | = 22.3 [dc]               |

#14

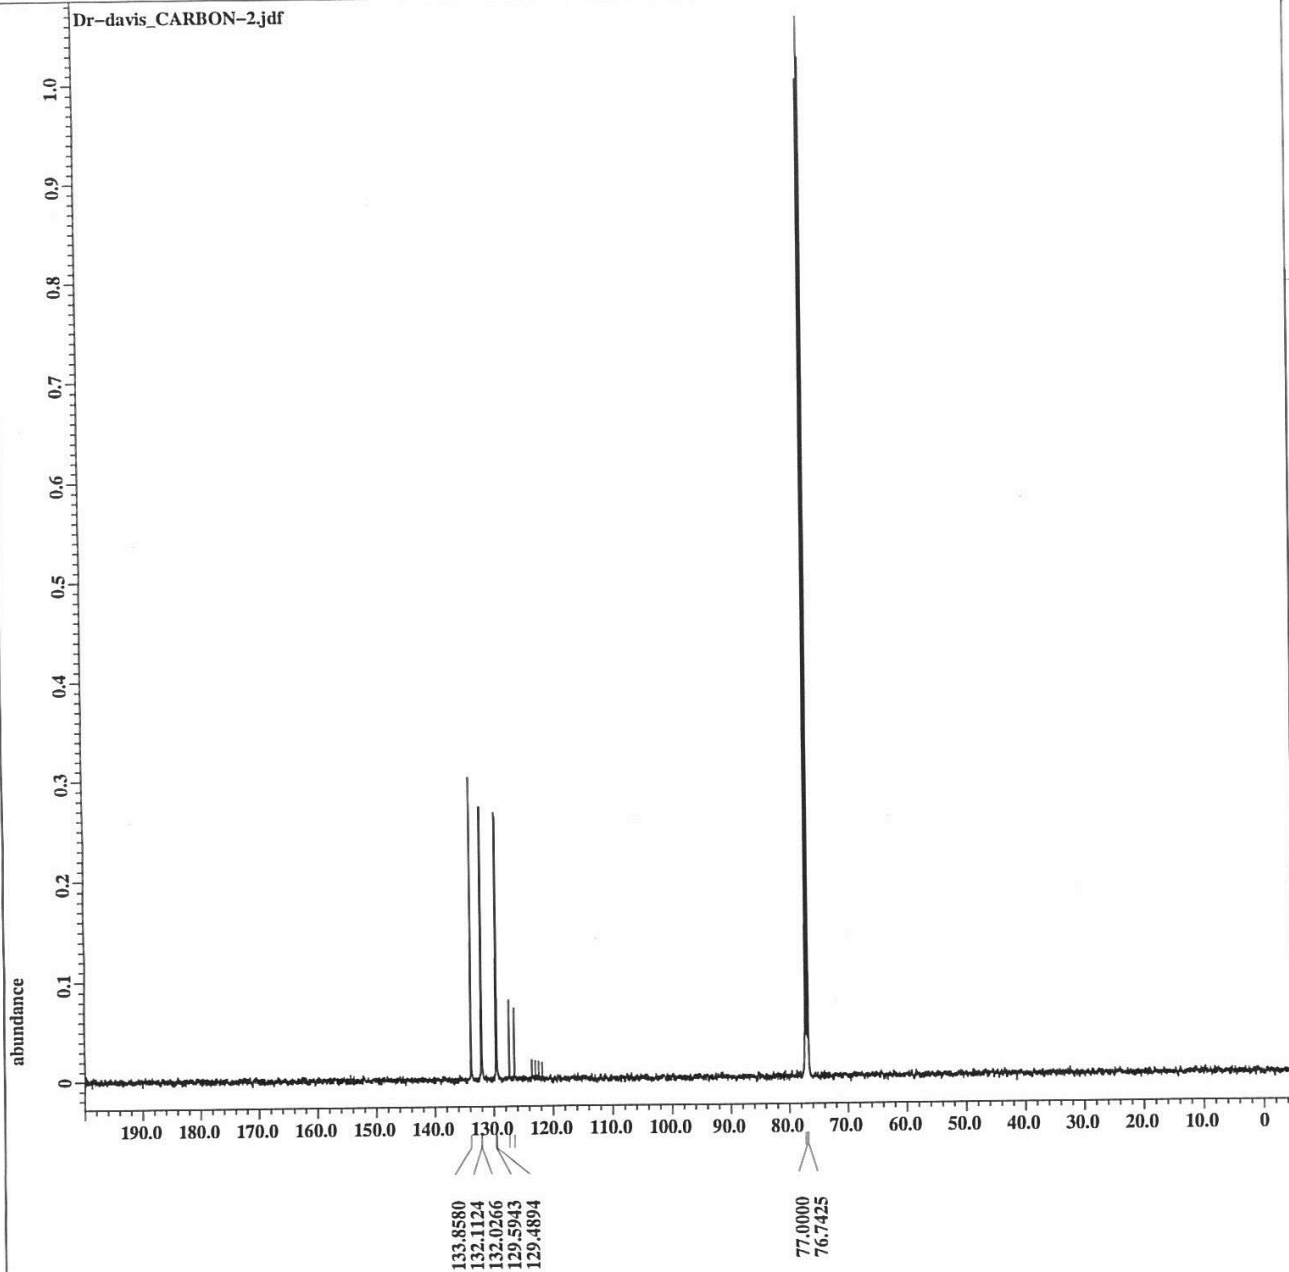

X : parts per Million : 13C

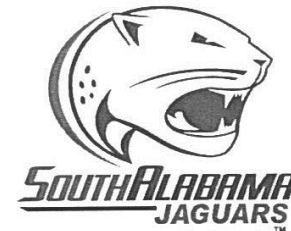

Filename = Dr-davis\_CARBON-2.jdf  
Author = Jim Davis  
Experiment = single\_pulse\_dec  
Sample\_id = Dr-davis  
Solvent = CHLOROFORM-D  
Changer\_sample = 6  
Creation\_time = 22-MAY-2017 12:18:25  
Revision\_time = 22-MAY-2017 11:55:49  
Current\_time = 22-MAY-2017 11:55:49

Data\_format = 1D COMPLEX  
Dim\_size = 26214  
Dim\_title = 13C  
Dim\_units = [ppm]  
Dimensions = X  
Site = ECA 500  
Spectrometer = JNM-ECA500

Field\_strength = 11.7473579 [T] (500 [MH  
X\_acq\_duration = 0.83361792 [s]  
X\_domain = 13C  
X\_freq = 125.76529768 [MHz]  
X\_offset = 100 [ppm]  
X\_points = 32768  
X\_prescans = 4  
X\_resolution = 1.19959034 [Hz]  
X\_sweep = 39.3081761 [kHz]  
Irr\_domain = 1H  
Irr\_freq = 500.15991521 [MHz]  
Irr\_offset = 5.0 [ppm]  
Clipped = FALSE  
Mod\_return = 1  
Scans = 1024  
Total\_scans = 1024

X\_90\_width = 12.7 [us]  
X\_acq\_time = 0.83361792 [s]  
X\_angle = 30 [deg]  
X\_atn = 6 [dB]  
X\_pulse = 4.23333333 [us]  
Irr\_atn\_dec = 20.5 [dB]  
Irr\_atn\_noe = 20.5 [dB]  
Irr\_noise = WALTZ  
Decoupling = TRUE  
Initial\_wait = 1 [s]  
Noe = TRUE  
Noe\_time = 2 [s]  
Recvr\_gain = 60  
Relaxation\_delay = 2 [s]  
Repetition\_time = 2.83361792 [s]  
Temp\_get = 22.2 [dc]

#14
